Heinze, Bens, Calzia, et al.

1                   **Species comparison of liver proteomes reveals**  
2                   **enhanced lipid metabolism, reduced mitochondrial**  
3                   **respiration and enhanced expression of detoxifying enzymes**  
4                   **in the long-lived naked mole-rat**

5  
6 **Authors:**

7  
8 Ivonne Heinze<sup>1\*</sup>, Martin Bens<sup>1\*</sup>, Enrico Calzia<sup>2\*</sup>, Susanne Holtze<sup>3</sup>, Oleksandr  
9 Dakhovnik<sup>1</sup>, Arne Sahm<sup>1</sup>, Joanna M. Kirkpatrick<sup>1</sup>, Karol Szafranski<sup>1</sup>, Natalie  
10 Romanov<sup>4</sup>, Stephan Singer<sup>5</sup>, Maria Ermolaeva<sup>1</sup>, Matthias Platzer<sup>1#</sup>, Thomas  
11 Hildebrandt<sup>3#</sup> and Alessandro Ori<sup>1#</sup>

12  
13 <sup>1</sup> Leibniz Institute on Aging – Fritz Lipmann Institute (FLI), Jena, Germany

14 <sup>2</sup> Institute of Anesthesiological Pathophysiology and Process Engineering, University of Ulm,  
15 Germany

16 <sup>3</sup> Leibniz Institute for Zoo & Wildlife Research (IZW), Berlin, Germany

17 <sup>4</sup> Structural and Computational Biology Unit, European Molecular Biology Laboratory, Heidelberg,  
18 Germany

19 <sup>5</sup> Institute of Pathology, University Hospital Heidelberg, Heidelberg, Germany

20  
21 \* co-first authors

22 # co-senior authors

23  
24 Correspondence should be addressed to: [matthias.platzer@leibniz-flj.de](mailto:matthias.platzer@leibniz-flj.de) or [HILDEBRAND@izw-](mailto:HILDEBRAND@izw-berlin.de)  
25 [berlin.de](mailto:berlin.de) or [alessandro.ori@leibniz-flj.de](mailto:alessandro.ori@leibniz-flj.de)

26  
27 **Abstract:**

28  
29 Mammals display wide range of variation in their lifespan. Lifespan is generally  
30 correlated to body size, but outliers such as human and the naked mole-rat  
31 (NMR, *Heterocephalus glaber*) exist. Investigating the molecular networks that  
32 distinguish long- from short-lived species has proven useful to identify  
33 determinants of longevity. Here, we compared the liver of long-lived NMRs and  
34 the phylogenetically closely related, shorter-lived, guinea pigs (GP, *Cavia*  
35 *porcellus*) using an integrated transcriptomic and proteomic approach. We found  
36 that NMRs express substantially higher levels (up to 30 fold) of a restricted  
37 number of longevity-associated proteins that confer enhanced buffering against  
38 oxidative stress. Moreover, NMR livers display a unique expression pattern of  
39 mitochondrial proteins that result in distinct metabolic features of their  
40 mitochondria. For instance, we observed a generally reduced respiration rate  
41 associated with lower protein levels of respiratory chain components,  
42 particularly complex I, and increased capacity to utilize fatty acids. Interestingly,  
43 the same molecular networks are affected during aging in both NMR and  
44 humans, supporting a direct link to the extraordinary longevity of both species.  
45 Finally, we used our analysis to identify novel longevity pathways, and validated  
46 one of them experimentally in the phylogenetically distantly related nematode *C.*  
47 *elegans*.

Heinze, Bens, Calzia, et al.

49 **Introduction:**

50

51 Among mammals lifespan generally correlates with other life-history parameters  
52 such as gestation period and body mass [1]. In this perspective, a subterranean  
53 rodent, the naked mole-rat (*Heterocephalus glaber*, NMR), and humans represent  
54 two species outliers by having an exceptionally long lifespan relatively to their  
55 body mass. NMRs are eusocial animals that live in colonies where only a  
56 subgroup of animals is devoted to reproduction (usually a queen and one male  
57 called pasha) [2]. NMRs exhibit other exceptional traits including lifelong  
58 fertility, resistance to infection, high regenerative capacity, resistance to cancer  
59 and diabetes, reviewed in [3,4]. For these reasons, NMRs have drawn attention of  
60 multiple studies aimed at identifying the molecular mechanisms behind their  
61 extreme longevity and resistance to age-related diseases. Comparative genome  
62 analysis has revealed positively selected genes in NMR [5,6], and RNA-seq  
63 analysis revealed minimal changes in gene expression during aging [5,7],  
64 supporting the view of enhanced maintenance of homeostasis in NMRs at the  
65 molecular level. NMRs possess enhanced protein stability and increased  
66 proteasomal activity [8,9], negligible levels of cellular senescence [10], over-  
67 activation of pathways that contribute to stress resistance (e.g., the nuclear  
68 factor erythroid2-related factor 2 (NFE2L2, previously NRF2/Nrf2) and p53)  
69 [3,11], atypical expression of extracellular matrix components, such as high  
70 molecular mass hyaluronan, that confer resistance against cancer development  
71 [12]. Intriguingly, NMRs have higher steady-state levels of oxidative damage  
72 compared to, e.g., mouse [8,13], and possess mitochondria with unusual  
73 morphology in the heart and skeletal muscle [14]. However, NMRs appear to be  
74 protected from the age-dependent increase in oxidative damage that manifest in  
75 other species [8], presumably due to enhanced detoxifying systems [15].

76

77 There is a wealth of evidence linking energy metabolism to the aging process and  
78 organism lifespan. Dietary interventions and nutrient sensing pathways have  
79 been shown to play a central role in modulating aging in different organisms  
80 [16–18]. Studies of genes under positive selection pressure across related  
81 species that show different lifespan have highlighted genes involved in  
82 mitochondrial homeostasis balance [19], likely influencing both energy  
83 metabolism and hormetic responses affecting lifespan [20]. Age-dependent  
84 changes of mitochondrial ultrastructure and activity have been described both in  
85 flies and mice [21].

86

87 There is emerging evidence that metabolic changes in the NMR contribute to  
88 adaptation to its ecosystem [22], allow to act as a “superorganism” with its  
89 eusocial life style [4], and might be related to its extreme longevity. However, the  
90 relationship between NMR metabolism and longevity has not yet been  
91 investigated. Given its central role in organism metabolism, we set out to  
92 investigate the liver of NMRs in order to identify novel molecular signatures of  
93 longevity. Since ecological adaptations are more likely to affect gene expression  
94 (Fraser 2013), and mechanisms of aging act both at the transcript and protein  
95 level [23], we performed a cross-species comparison between NMR and the  
96 shorter-lived guinea pig (*Cavia porcellus*, GP) using an integrated proteomic and  
97 transcriptomic approach. In order to investigate cross-species differences in the

Heinze, Bens, Calzia, et al.

98 context of aging, we additionally analyzed livers from young and old NMRs, and  
99 related the identified changes to human aging by studying the liver proteome of  
100 12 individuals aged between 31 and 88 years. Finally, we validated one of the  
101 newly identified longevity pathways to be a mediator of lifespan in the nematode  
102 *C. elegans*.  
103

Heinze, Bens, Calzia, et al.

104 **Results:**

105

106 *Cross-species comparison of liver proteomes reveals elevated expression of*  
107 *detoxifying enzymes in naked mole rats*

108

109 We first compared the liver proteomes of 4 young adult male NMRs (2.7-3.8 year  
110 old (yo)) and GPs (0.7-1 yo) using mass spectrometry (Table S1). For each  
111 animal, we obtained a quantitative proteome profile by liquid chromatography  
112 tandem mass spectrometry, and estimated absolute protein abundances using  
113 the iBAQ method [24]. In order to directly compare the two species, we mapped  
114 both NMR and GP proteins to the respective human orthologs, and used these as  
115 the reference for comparison (see Material and Methods). This allowed us to  
116 perform a quantitative comparison of the two species using estimated absolute  
117 abundances for 3248 protein groups quantified by at least two unique  
118 proteotypic peptides in both species (Figure 1A and Table S2). In order to  
119 validate our approach, we obtained RNA-seq data from the same samples and  
120 determined transcript-level fold changes between the two species. For this, only  
121 those reads that exclusively mapped to conserved regions were used, a method  
122 used for transcriptomic cross-species comparisons [7] (Table S2). Protein and  
123 transcript fold changes displayed a significant positive correlation (Pearson  
124  $R=0.52$ ,  $p<2.2e-16$ , Figure 1B), which is in line with comparisons performed  
125 within the same species [25]. These data indicate that our strategy can reveal  
126 meaningful differences in protein abundance between species and that many of  
127 these changes are driven by changes in transcript levels.

128

129 We next asked whether our comparison would reveal known longevity-  
130 associated proteins. We found strikingly higher levels of peroxiredoxin 1  
131 (PRDX1) and thioredoxin reductase 1 (TXNRD1) in NMRs as compared to GPs  
132 (Figure 1C and D). *PRDX1* and *TXNRD1* are both target genes of the transcription  
133 factor NFE2L2, they play a crucial role in maintaining cell redox homeostasis,  
134 and both have been shown to influence lifespan in multiple species by buffering  
135 ROS and promoting proteostasis [26–28]. Interestingly, both PRDX1 and  
136 TXNRD1 are cytosolic enzymes, and their mitochondrial counterparts (PRDX5,  
137 TXNRD2) are instead expressed at similar levels in both species (Table S2).

138

139 We next wondered whether we could identify similar differences in other organs.  
140 For this purpose, we compared RNA-seq data from heart, skin, kidney and  
141 cerebellum across the two species and found that increased transcript levels of  
142 *PRDX1* occur exclusively in the liver (Figure 1E and F). This suggests that  
143 increased level PRDX1 and TXNRD1 might be linked to a specific metabolic  
144 activity of the NMR liver.

145

146

147

Heinze, Bens, Calzia, et al.

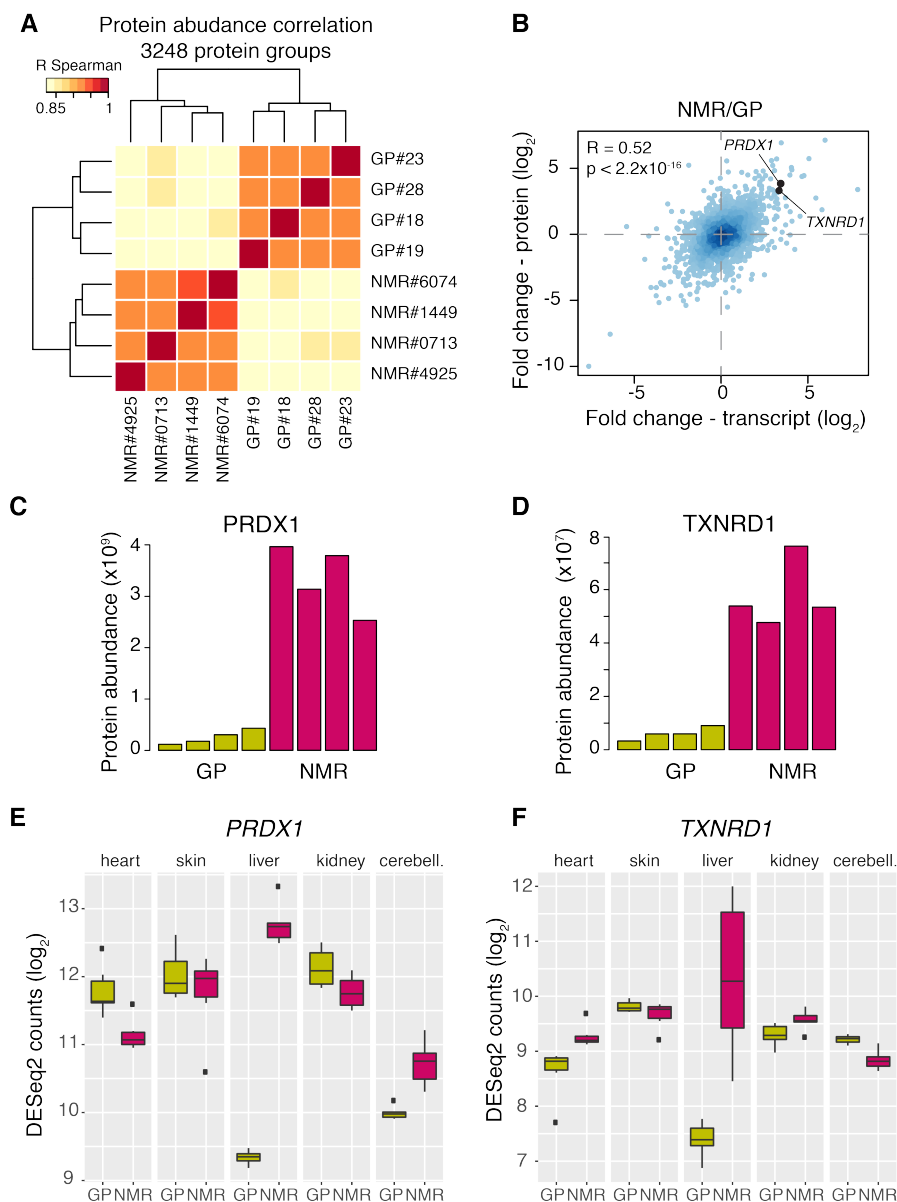

148  
149

150 **Figure 1. Cross-species comparison of the liver proteome integrated with**  
 151 **RNA-seq from the same animals. (A)** Liver proteomes from 4 adult naked mole  
 152 rats (NMRs) and 4 guinea pigs (GPs) were compared using quantitative mass  
 153 spectrometry. Hierarchical clustering based on the correlation between  
 154 proteome profiles based on 3248 protein groups quantified across the two  
 155 species. **(B)** Correlation between fold changes estimated at the protein level by  
 156 quantitative mass spectrometry and at the transcript level by RNA-seq. For RNA-  
 157 seq analysis only reads mapping to conserved regions between the two species  
 158 were considered. **(C and D)** PRDX1 and TXNRD1 as examples of longevity-  
 159 associated proteins that show drastically increased abundance in NMR vs. GP.  
 160 Each bar represents the abundance estimated for one animal. **(E and F)**  
 161 Comparison of transcript levels of PRDX1 and TXNRD1 across multiple tissues.  
 162 For both genes, transcript levels are increased in NMR vs. GP in the liver  
 163 ( $q < 2.2 \times 10^{-300}$  for PRDX1;  $q = 1.5 \times 10^{-45}$  for TXNRD1), while they show similar  
 164 abundances in the other tissues examined. Related to Tables S1 and S2.

Heinze, Bens, Calzia, et al.

165 *The liver of naked mole rats has a unique metabolism characterized by reduced*  
166 *mitochondrial respiration and enhanced lipid metabolism*

167

168 Intrigued by this finding, we used gene set enrichment analysis to investigate  
169 differences in pathways and molecular networks between the long-lived and  
170 shorter-lived species. Our analysis returned pathways linked to energy  
171 metabolism (Figure 2A and Table S3). In particular, we found pathways related  
172 to lipid metabolism to be up regulated, and gene sets related to oxidative  
173 phosphorylation to be down regulated in NMR ( $q < 0.05$ ). Among up-regulated  
174 proteins involved in lipid metabolism, we found enzymes responsible for fatty  
175 acid beta-oxidation (e.g., ACOX2 and ACOX3), and lipid (e.g., ACACA and ACSL5),  
176 cholesterol (e.g., MVD and DHCR24) and bile acids biosynthesis (e.g., AMACR)  
177 compared to GP (Figure 2A and B and Table S2). Many of these are direct target  
178 of the nuclear receptor peroxisome proliferator-activated receptor alpha  
179 (PPAR $\alpha$ ), a master regulator of energy metabolism linked to aging [29] (Figure  
180 2B). The majority of these enzymes showed higher abundance in the liver of  
181 NMRs both at transcript and protein level, irrespectively of their sub-cellular  
182 localization (Figure 2B).

183

184 In order to exclude that such differences would arise from a different organelle  
185 composition of the NMR liver cells, we analyzed the distribution of fold changes  
186 for proteins belonging to different cell compartments and found slight, but  
187 significantly lower general levels of mitochondrial proteins (mean  $\log_2$  fold  
188 change=-0.17,  $p=0.01$ , Welch two sample t-test), and higher levels of lysosomal  
189 proteins (mean  $\log_2$  fold change=0.2,  $p=0.005$ , Welch two sample t-test) in NMR  
190 compared to GP.

191

192 Regarding oxidative phosphorylation, NMRs showed reduced abundance of a  
193 subset of mitochondrial respiratory chain components (Figure 2C). Interestingly,  
194 these differences manifested almost exclusively at the protein level, and affected  
195 to different extents the respiratory chain complexes, with components of  
196 complex I being the most strongly reduced (mean  $\log_2$  fold change=-1.53,  
197  $p=7.2 \times 10^{-5}$ , Welch two sample t-test, Figure 2D). The opposite changes of  
198 mitochondrial enzymes involved in lipid metabolism and respiratory chain  
199 components indicate that NMR livers possess a distinct composition of their  
200 mitochondrial proteome.

201

202 In order to investigate whether proteomic differences result in altered  
203 mitochondrial activity of NMR liver parenchyma, we performed *ex vivo*  
204 measurements of cellular respiration in liver extracts of NMR by means of high-  
205 resolution respirometry (see Material and Methods). We measured  
206 mitochondrial respiration from an independent group of adolescent (1 yo,  $n=4$ )  
207 and mature adult (10 yo,  $n=4$ ) male NMRs and compared them to mature adult  
208 male mice (6-8 mo,  $n=4$ ). We first compared the contribution of fatty acids to  
209 mitochondrial activity using octanoylcarnitine and malate as substrates. After  
210 this, maximum coupled respiration-state (OXPHOS-state) was established by  
211 further addition of glutamate and succinate. Finally, we completed the test  
212 sequence by adding carbonyl cyanide p-(trifluoromethoxy)-phenylhydrazone  
213 (FCCP) in order to achieve the maximum uncoupled respiration-state. We

Heinze, Bens, Calzia, et al.

214 observed (Figure 2E) that NMRs and mice showed similar rates of mitochondrial  
215 respiration supported by fatty acids. In contrast, NMR livers show reduced  
216 maximum mitochondrial activity compared to mouse liver. In line with the  
217 reduced abundance of respiratory chain components, mitochondrial oxygen  
218 consumption normalized per wet tissue volume was significantly reduced in  
219 both maximum OXPHOS (35% ( $p=0.011$ ) and 37% ( $p=0.014$ ) in 1 and 10 yo  
220 NMRs, respectively; one-way ANOVA followed by Bonferroni's t-test), and  
221 maximum uncoupled states (51% ( $p<0.001$ ) and 54% ( $p<0.001$ )). This implies a  
222 ~2-fold higher fatty acid supported mitochondrial respiration in NMRs  
223 compared to mice (Figure 2F). Taken together, our data indicate a marked  
224 rearrangement of energy metabolism in the liver of NMR characterized by an  
225 enhanced lipid metabolism and globally reduced level of mitochondrial  
226 respiration.  
227

Heinze, Bens, Calzia, et al.

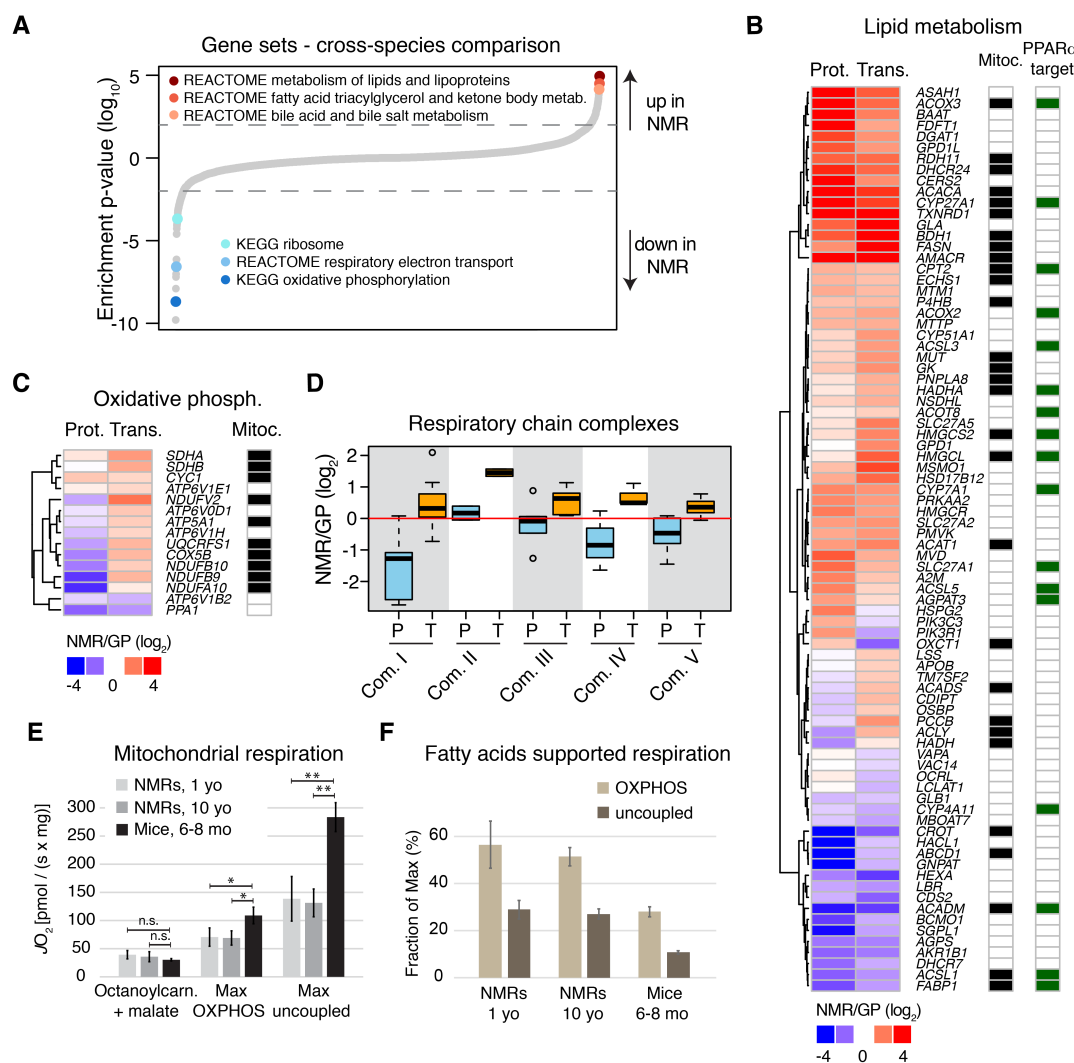

228  
 229

230 **Figure 2. Distinctive features of NMR liver metabolism.** (A) Gene set  
 231 enrichment analysis was performed on proteomic data. Gene sets are plotted  
 232 according to the log<sub>10</sub> value of the calculated enrichment score. Positive and  
 233 negative values are used for gene sets showing higher and lower abundance in  
 234 NMR, respectively. Because of the redundancy among the significantly affected  
 235 gene sets ( $q < 0.05$ ), we highlighted representative categories of gene sets. The  
 236 complete list of enriched gene sets is available in Table S3. (B) Protein (P) and  
 237 transcript (T) fold changes for genes involved in lipid metabolism ("REACTOME  
 238 METABOLISM OF LIPIDS AND LIPOPROTEINS", combined RNA-seq and  
 239 proteome  $q < 0.001$ ), and (C) oxidative phosphorylation that are significantly  
 240 affected in NMR vs. GP (selection criteria as in B). (D) Fold changes comparison  
 241 for genes of the different complexes of the respiratory chain. Light blue and  
 242 orange boxes indicate protein and transcript fold changes, respectively. (E)  
 243 Mitochondrial oxygen flux supported by octanoylcarnitine and malate, compared  
 244 to maximum coupled (OXPHOS) and maximum uncoupled respiration in liver of  
 245 NMR (1 and 10 yo) and 6-8 mo male mice. (F) Ratio of fatty acid supported  
 246 respiration to maximum OXPHOS and uncoupled respiration in liver of NMR and  
 247 mouse. In E and F, reported values are averages obtained from  $n = 4$  animals per  
 248 experimental group  $\pm$  standard deviation. \* =  $p < 0.05$ ; \*\* =  $p < 0.001$ ; n.s. = not  
 249 significant. Related to Table S3.



Heinze, Bens, Calzia, et al.

250 *Cross-species- and aging-related changes correlate*

251

252 Given the existing evidences linking both lipid metabolism and oxidative  
253 phosphorylation to lifespan [30,31], we investigated how these pathways are  
254 affected during aging in NMRs. We therefore compared the liver proteome of  
255 young (3-4 yo) and old (>20 yo) NMRs using quantitative mass spectrometry  
256 (Figure 3A, Table S1 and S4). Gene Ontology analysis, based on 5237 protein  
257 groups quantified by at least 2 unique peptides, revealed changes that are typical  
258 of the aging process (Figure 3B). These include increased inflammation and  
259 immune response-related proteins [23], and accumulation of extracellular  
260 matrix proteins [32]. Interestingly, we found a statistically significant overlap  
261 between proteins differentially abundant in NMR vs. GP, and proteins whose  
262 abundance is affected by NMR aging (99 proteins,  $p=2 \times 10^{-4}$ , Fisher's exact test,  
263 Figure 3C). Additionally, we observed a negative correlation between protein  
264 fold changes across species and NMR aging (Pearson  $R=-0.38$ ,  $p=0.0001$ ; Figure  
265 3D), resulting in a significant difference between cumulative distributions of  
266 NMR vs. GP fold changes for proteins up- or down-regulated in NMR aging  
267 ( $p=0.002$ , Kolmogorov-Smirnov-test; Figure 3E). The directionalities of the  
268 differences indicate that proteins with decreasing expression during NMR aging  
269 tend to have a higher level in young NMR compared to GP, whereas, proteins  
270 with increasing expression during NMR aging tend to start from a lower level in  
271 young NMR than in GP. Statistical significance for overlap ( $p=0.008$ , Fisher's  
272 exact test), anti-correlation of fold changes (Pearson  $R=-0.18$ ,  $p=1.8 \times 10^{-8}$ ), and  
273 difference between cumulative distributions ( $p=3.1 \times 10^{-12}$ , Kolmogorov-Smirnov-  
274 test) can also be observed from RNA-seq data obtained from the same animals  
275 (Figure S1). In particular, we found among the 30 liver proteins up in NMR vs. GP  
276 and down during NMR aging 13 linked to lipid or fatty acid and 5 to xenobiotic  
277 metabolism (Figure 3F). Our data suggest that this group of proteins might be  
278 involved in sustaining the longevity of NMRs, and their decline during aging  
279 might contribute to a phenotypically/functionally not yet reported reduction of  
280 liver function.

281

Heinze, Bens, Calzia, et al.

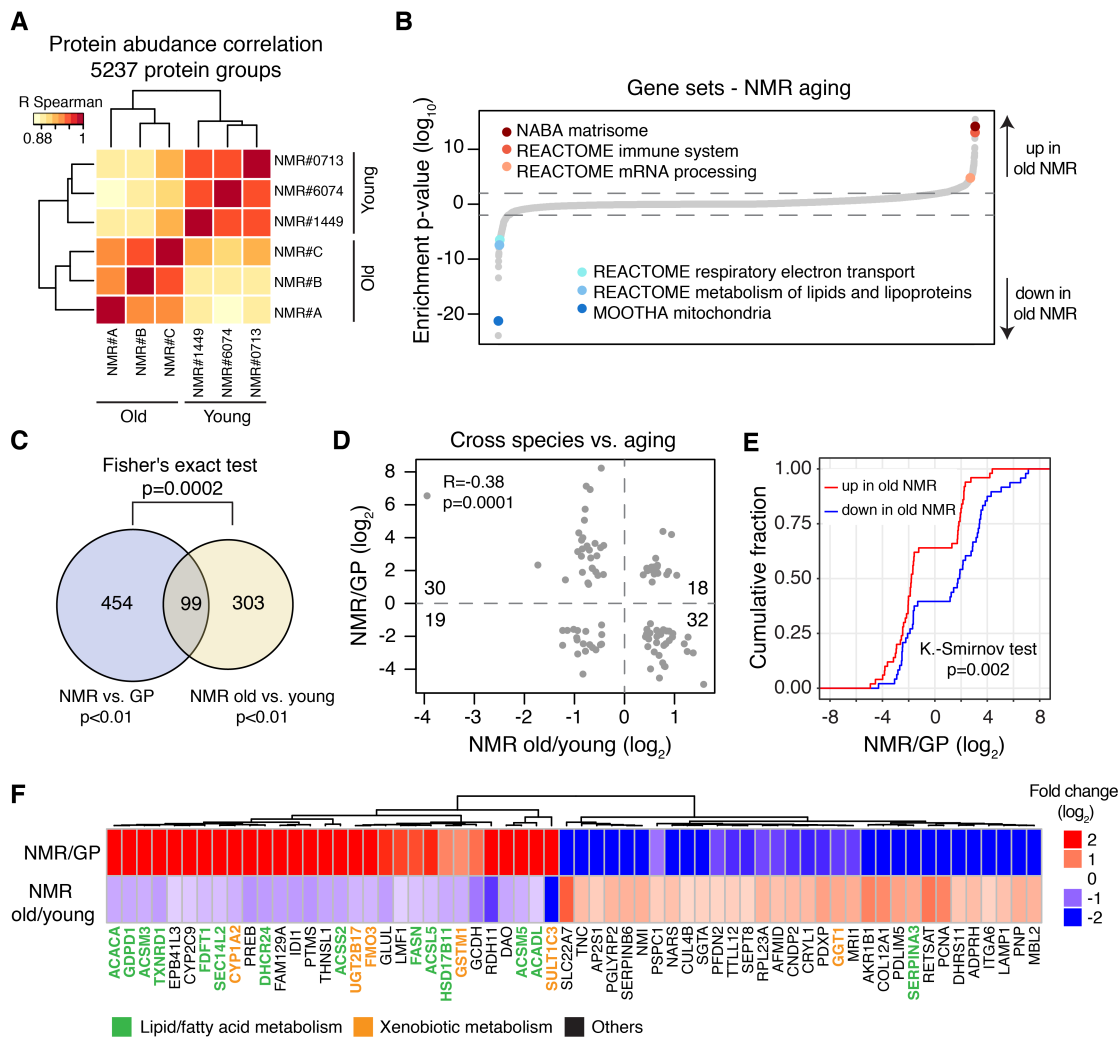

282

283

284 **Figure 3. The impact of aging on the NMR liver proteome** (A) Livers from 3  
285 young (2.7-3.8 yo) and 3 old (>20 yo) NMRs were compared by Tandem Mass  
286 Tags (TMT) based quantitative mass spectrometry. Hierarchical clustering based  
287 on the correlation between proteome profiles based on 5237 protein groups  
288 cross-quantified between the two age groups (Table S4). (B) Gene set  
289 enrichment analysis. Gene sets are plotted according to the  $\log_{10}$  value of the  
290 calculated enrichment score. Positive and negative values are used for gene sets  
291 showing higher and lower abundance in old NMRs, respectively. Selected  
292 significantly affected gene sets ( $q < 0.05$ ) are highlighted. The complete list of  
293 enriched gene sets is available in Table S5. (C) Overlap between proteins  
294 differentially expressed in NMR vs. GP and affected by aging in NMR. (D)  
295 Comparison between cross-species and aging-related fold changes for the 99  
296 proteins significantly different in both comparisons. (E) Cumulative distributions  
297 of significant NMR vs. GP fold differences for the 99 proteins also significantly  
298 up- (red) or down- (blue) regulated in aging. (F) The 62 proteins with significant  
299 but opposite fold changes in both comparisons (Table S6). Proteins involved in  
300 lipid/fatty acid metabolism and xenobiotic metabolism are highlighted in green  
301 and orange, respectively. Related to Figure S1 and Tables S4, S5 and S6.

302

303

304

Heinze, Bens, Calzia, et al.

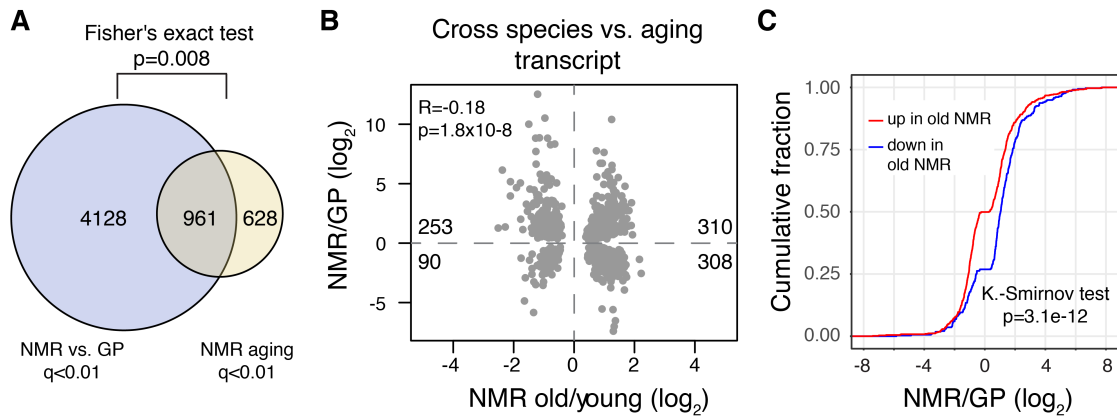

305

306

307

308 **Figure S1. Correlations between liver transcript level differences of NMR**

309 **vs. GP and during NMR aging. (A)** Significant overlap between differentially

310 expressed genes (DEGs) in NMR vs. GP and in aging of NMR. **(B)** Comparison

311 between cross-species and aging-related fold changes for the 875 DEGs

312 significant in both comparison ( $q<0.01$ ) shows significant negative correlation.

313 **(C)** Cumulative distributions of NMR vs. GP fold changes for the 875 DEGs also

314 significantly up- (red) or down- (blue) regulated in NMR aging. The x-axis was

315 restricted to  $\pm 8$  for display purpose. Related to Figure 3 and Table S6.

Heinze, Bens, Calzia, et al.

316 *Aging affects similar pathways in both NMR and human liver*

317

318 In order to generalize our findings to other species and in particular to human  
319 aging, we analyzed the proteome of donor liver samples from 12 individuals  
320 aged between 31 and 88 years (Table S1). In this case, we used formalin fixed  
321 and paraffin embedded (FFPE) samples and quantitatively compared the  
322 proteomes using mass spectrometry. Principal Component Analysis (PCA) based  
323 on 3211 quantified protein groups revealed separation of the proteome profiles  
324 based on the age of the donor (Figure 4A). Guided by the PCA analysis, we split  
325 the individuals into two groups defined as young (below 50 years of age) and old  
326 (above 66 years), and analyzed differential protein expression for 3064 protein  
327 groups quantified across all samples (Table S7). Multiple lines of evidence  
328 indicate that aging affects similar pathways in both human and NMR liver. First,  
329 as in NMR, GO enrichment analysis revealed an age-dependent decline of  
330 proteins involved in lipid metabolism and detoxification of xenobiotics, and an  
331 increase of proteins related to immune response (Figure 4B and Table S7), and  
332 inflammation markers such as RELA/p65 (Figure 4C). Second, enzymes involved  
333 in lipid synthesis such as ACACA and DHCR24, which were found to be expressed  
334 at higher level in NMR vs. GP and to decline during NMR aging, showed a  
335 negative correlation with the age of the donor (Figure 4D and 4E). Enzymes  
336 involved in fatty acid beta-oxidation, including ACAA2 and HADHA, also showed  
337 a trend of lower abundance in livers from older individuals (Figure S2A). Third,  
338 these changes in metabolic enzymes underline a more general reorganization of  
339 the liver proteome that is characterized by a significant reduction of both  
340 mitochondrial and peroxisomal proteins during aging in both NMR and human  
341 (Figure 4F). Fourth, multiple proteins involved in different steps of the  
342 xenobiotic metabolism showed similar trends. Cytochrome P450s, a subset of  
343 Glutathione S-transferases (GSTs), and UDP-glucuronosyltransferases (UGTs)  
344 were in most cases expressed at higher levels in NMR vs. GP and showed an age-  
345 dependent decline both in NMR and in human (Figures 4G and S2B). Taken  
346 together these data indicate that conserved pathways are affected in NMR and  
347 humans during aging.

Heinze, Bens, Calzia, et al.

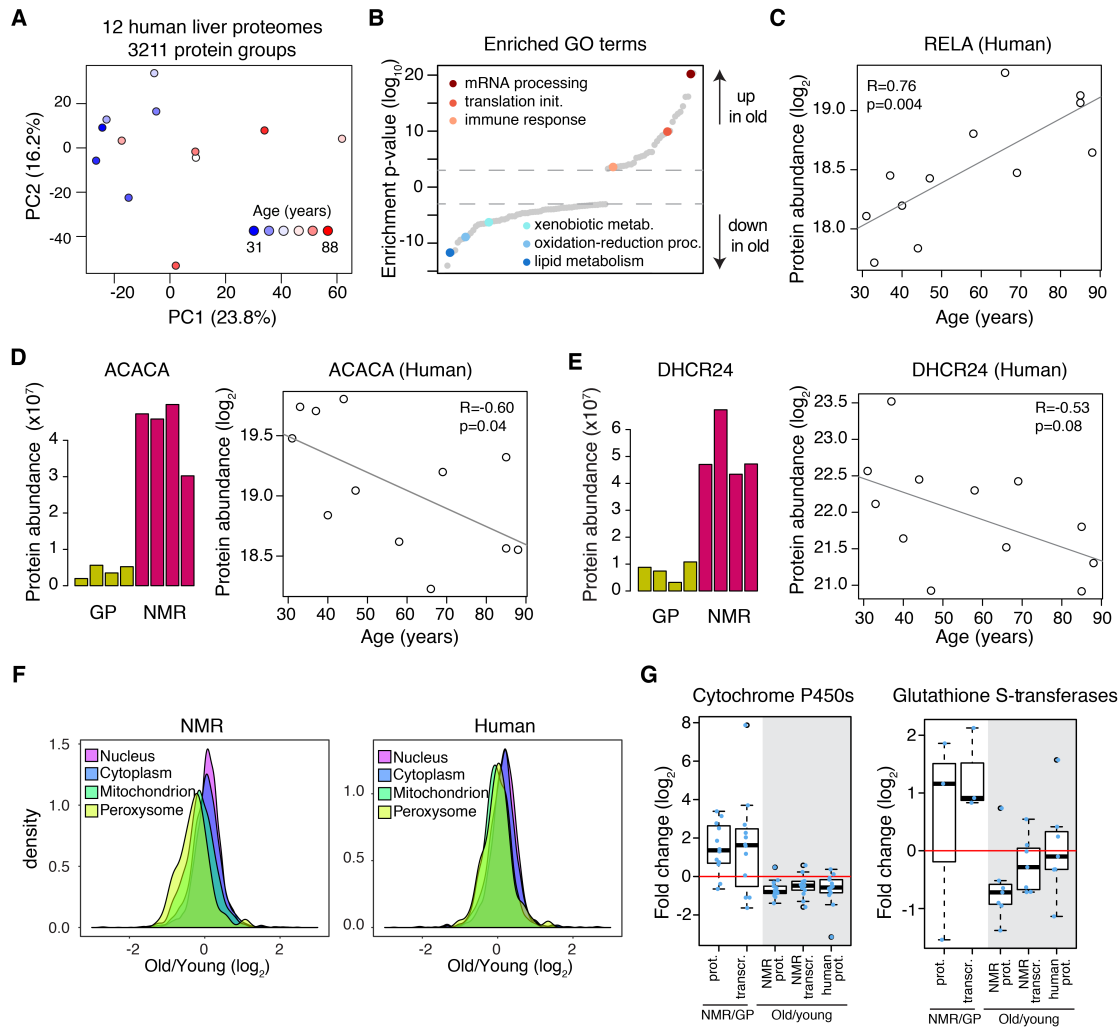

348  
349

350 **Figure 4. The impact of aging on the human liver proteome and comparison**  
 351 **to NMR aging. (A)** FFPE liver samples from 12 human donors aged 31-88 years  
 352 old were analysed by Data Independent Acquisition (DIA) quantitative mass  
 353 spectrometry. Principal Component Analysis (PCA) of the proteome profiles  
 354 based on 3211 protein groups quantified. **(B)** Gene Ontology (GO) enrichment  
 355 analysis based on differential protein expression between young (<47 yo, n=6)  
 356 and old (>66 yo, n=5) donors. One donor aged 58 yo was excluded from  
 357 differential expression analysis. GO categories are plotted according to the  $\log_{10}$   
 358 value of the calculated enrichment p-value. Positive and negative values are used  
 359 for gene sets showing higher and lower abundance in old individuals,  
 360 respectively. Selected significantly affected GO terms ( $p < 0.001$ ) are highlighted.  
 361 The complete list of enriched GO terms is available in Table S7. **(C)** The  
 362 inflammation marker RELA shows a steady increase of abundance with age. **(D)**  
 363 **and E)** Selected examples of enzymes involved in lipid metabolism being up  
 364 regulated in NMR vs. GP and decreasing during aging both in NMRs and humans.  
 365 **(F)** Mitochondrial and peroxisomal proteins decrease with age in both NMR and  
 366 human liver. Distributions of fold-changes were calculated separately for proteins  
 367 assigned to different cellular compartments. Mitochondrial ( $n=953$ ,  $p=1.2 \times 10^{-37}$  Welch  
 368 two sample t-test for NMR;  $n=716$ ,  $p=1.4 \times 10^{-21}$  Welch two sample t-test for  
 369 human) and peroxisomal proteins ( $n=95$ ,  $p=4.9 \times 10^{-6}$  Welch two sample t-test for  
 370 NMR;  $n=74$ ,  $p=8.9 \times 10^{-3}$  Welch two sample t-test for human) showed a significant

Heinze, Bens, Calzia, et al.

371 lower abundance in old samples as compared to the rest of the quantified  
372 proteins. **(G)** Major categories of detoxifying enzymes differentially expressed in  
373 NMR vs. GP and affected by aging in both NMR and humans (only significantly  
374 affected cases are shown for each group; cut-offs: NMR vs. GP and NMR aging,  
375 combined  $q < 0.05$ ; human proteome aging  $q < 0.1$ ). Related to Figure S2 and Table  
376 S7.  
377

Heinze, Bens, Calzia, et al.

378

379

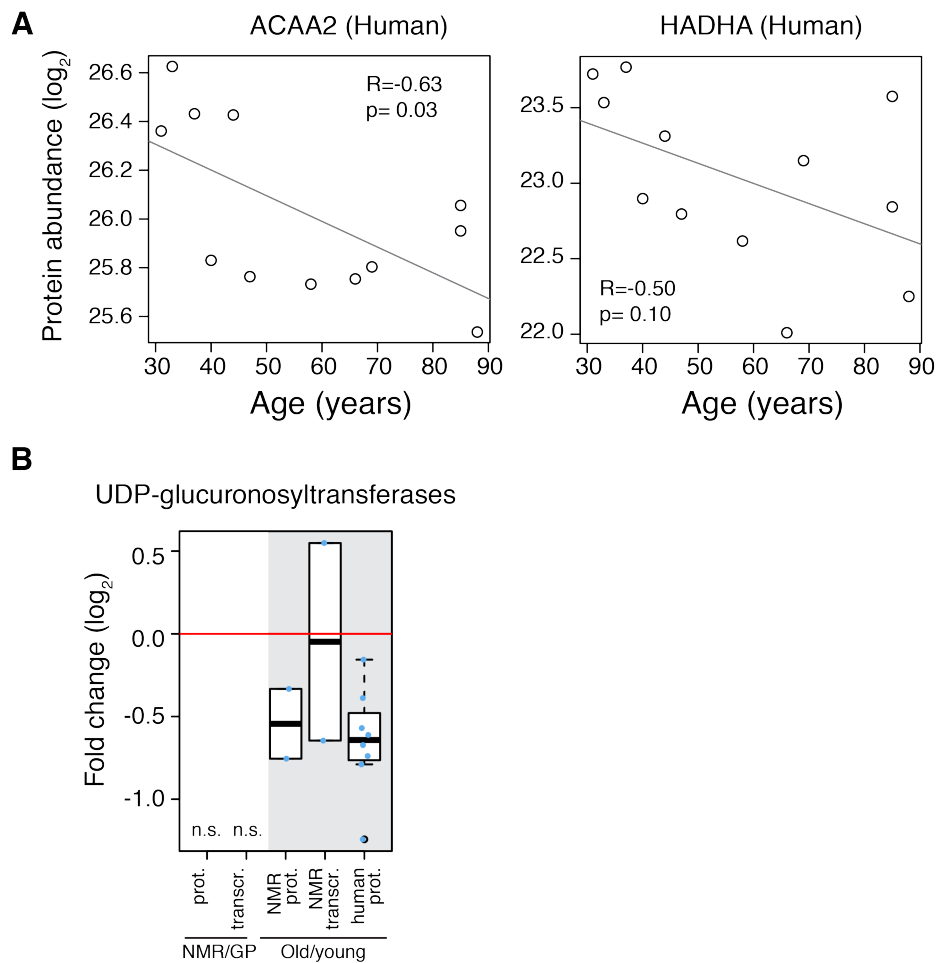

380

381

382 **Figure S2. Examples of enzymes involved in fatty acid beta-oxidation and**

383 **xenobiotic metabolism that decrease during aging in human liver. (A)**

384 Additional examples of enzymes involved in lipid metabolism decreasing during

385 aging in human liver. **(B)** Detoxifying enzymes decreasing during aging in both

386 NMR and humans. Only significantly affected genes are shown; cut offs: NMR

387 aging, combined  $q < 0.05$ ; human proteome aging  $q < 0.1$ ; n.s. = no significant cases

388 detected. Related to Figure 4.

389

Heinze, Bens, Calzia, et al.

390 *The detoxifying enzyme SULT1C3 mediates lifespan extension in C. elegans*

391

392 In order to demonstrate that proteins expressed at higher level in NMR are  
393 mechanistically linked to longevity, we focused on proteins involved in  
394 xenobiotic metabolism, and in particular the phase II enzyme SULT1C3 and its  
395 paralog SULT1C2. These enzymes are expressed at prominent level in NMR and  
396 they strongly decline during aging (Figure 5A and Figure S3). The *C. elegans*  
397 ortholog of SULT1C2/3 is SSU-1 (coded by *ssu-1*), and it was previously shown to  
398 be expressed at high levels in long-lived and stress-resistant dauer larvae  
399 (surviving up to 4 months compared to 2-3 weeks lifespan of a reproducing  
400 adult). High expression levels of *ssu-1* are thus associated with extended  
401 longevity also in worms [33]. The feeding of wild type worms with RNAi against  
402 *ssu-1* from L4 larval stage on resulted in significant reduction of their life span  
403 (median life span reduction of 13%) suggesting that *ssu-1* is required for normal  
404 lifespan of nematodes (Figure 5B). The remarkable stress resistance of dauer  
405 larvae is largely due to enhanced expression of pro-survival and detoxification  
406 genes mediated by DAF-16/FOXO transcription factor [34,35]. To test whether  
407 the FOXO pathway regulates the expression of *ssu-1* during adulthood and aging,  
408 we performed an epistasis experiment treating *daf-16* deficient nematodes with  
409 *ssu-1* RNAi. The lifespan reducing effect of the *ssu-1* RNAi is also observed in *daf-*  
410 *16* mutants (median lifespan reduction of 12%) (Figure 5C), suggesting that the  
411 function of *ssu-1* in normal aging is regulated by factors other than DAF-  
412 16/FOXO.

413



Heinze, Bens, Calzia, et al.

414

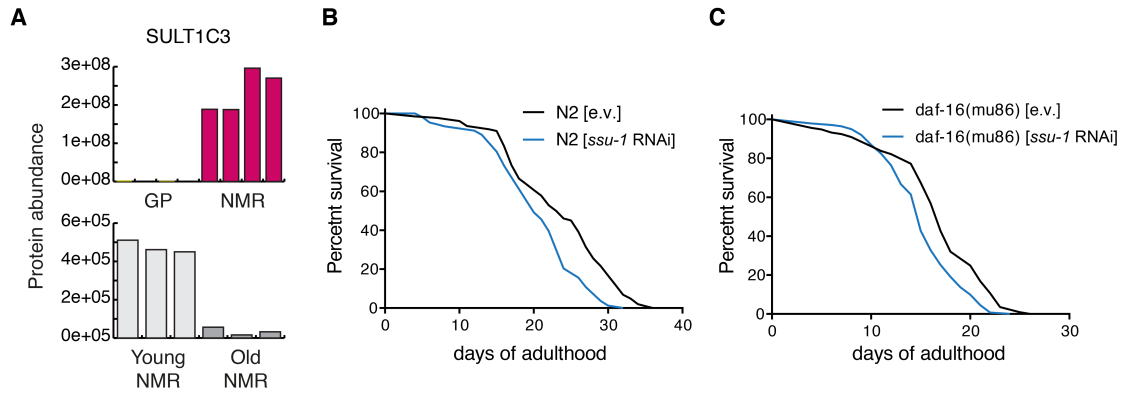

415

416

417 **Figure 5. Knock-down of SSU-1 (*ssu-1*) reduces lifespan in wild type and**  
418 ***daf-16(mu86)* mutant *C. elegans*. (A)** The orthologous mammalian phase II  
419 conjugation enzyme SULT1C3 is significantly more abundant in NMR compared  
420 to GP, and it declines with aging. **(B)** Wildtype (N2, Bristol strain) and **(C)** *daf-*  
421 *16(mu86)* mutant worms were treated with *ssu-1* and control empty vector (e.v.)  
422 RNAi from the L4 (pre-adult) developmental stage. Survival was scored daily; the  
423 significance of lifespan shortening was determined by Mantel-Cox Log rank test  
424 ( $p < 0.0001$  in both cases). Related to Figure S3.

425

Heinze, Bens, Calzia, et al.

426

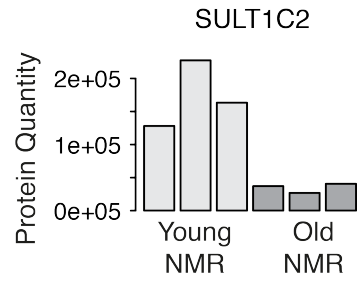

427

428

429 **Figure S3. SULT1C2 decreases with aging in NMR.** Related to Figure 5.

430

431

Heinze, Bens, Calzia, et al.

432 **Discussion:**

433

434 Cross-species comparisons based on transcriptional profiling have highlighted  
435 pathways that correlate with lifespan [1]. In this work, we decided to  
436 concentrate on the NMR, as an outlier of exceptional longevity, and directly  
437 relate the identified proteome changes to the ones observed in humans, another  
438 of those outliers. In our NMR vs. GP comparative approach, we generally  
439 observed a good correlation between transcriptome and proteome differences  
440 confirming that a great fraction of adaptation to local ecosystems occurs via  
441 changes in gene expression that translate into abundance changes of proteins.  
442 However, we have identified changes, particularly among complexes of the  
443 mitochondrial respiratory chain, which manifested exclusively at the proteome  
444 level. Importantly some of these changes are inline with measureable difference  
445 in mitochondrial activity in NMR.

446

447 Our cross-species analysis revealed that the liver of NMRs possesses three major  
448 characteristics compared to GP: (i) lower rate of mitochondrial respiration, due  
449 to reduced level of complex I; (ii) higher reliance on fatty acids for energy  
450 production, deriving from increased abundance of enzymes responsible for lipid  
451 turnover; and (iii) increased expression of detoxifying enzymes. Although we  
452 cannot exclude that some of the observed changes derive from differences in diet  
453 between the two compared species, the fact that mitochondrial and oxidative  
454 phosphorylation genes were identified to be differentially expressed also in  
455 NMRs vs. wild mice [7] supports the peculiarity of NMR liver metabolism among  
456 rodents. Importantly, we have also shown that the aging process itself negatively  
457 affects the abundance of proteins involved in lipid metabolism and detoxification  
458 processes both in NMR and humans. These pathways are similarly affected with  
459 aging also in mice [36].

460

461 Two major questions arise from our work: how NMRs have evolved their  
462 particular liver metabolism, and how does this contribute to the extreme  
463 longevity of these animals? Multiple studies have previously linked the  
464 composition of the mitochondrial respiratory chain to lifespan extension in  
465 multiple species [31]: altered composition of the respiratory chain has been  
466 show to induce a hormetic response that can extend lifespan in *C.elegans* [37];  
467 mild inhibition of complex I leads to increased lifespan in the short-lived fish *N.*  
468 *furzeri* [38]; low abundance of the matrix arm of complex I predicts longevity in  
469 mice [39]; fibroblasts isolated from long lived individuals including centenarians  
470 show altered mitochondrial activity with lower complex I driven ATP synthesis  
471 [40].

472

473 Similarly, lipid homeostasis and signaling has been linked to health and longevity  
474 [30], and changes in lipid metabolism have been shown to mediate the positive  
475 effects of anti-aging dietary interventions. Dietary interventions such as calorie  
476 restriction (CR) or fasting influence lipid metabolism [41,42]. Transcriptomic  
477 and metabolomic measurements showed that CR promotes fatty acid fueling of  
478 mitochondria in liver of mice and it is accompanied by changes in body fat  
479 composition [43]. Both fatty acid oxidation and lipid metabolism pathways as  
480 well as xenobiotic metabolism are induced by CR in mouse liver via epigenetic

Heinze, Bens, Calzia, et al.

481 reprogramming [44]. Changes in lipid metabolism are mechanistically linked to  
482 activation of stress response pathways that mediate enhanced proteostasis [45],  
483 and fatty acid oxidation and functional peroxisomes are required to maintain  
484 mitochondria network homeostasis and promote longevity in *C. elegans* [46]. In  
485 humans, shifts in body composition accompany aging including a decrease of  
486 lean mass and accumulation of body fat. Fatty acid oxidation by respiring tissue  
487 decreases with age in humans [47,48], however there are discordant reports  
488 [49]. A decrease in fatty acid oxidation during aging can lead to adipose tissue  
489 accumulation and thus contribute to increased systemic inflammation, a major  
490 risk factor for aging-associated disease such as type II diabetes [50]. Our data  
491 show that in both NMR and human liver there is a progressive decline of  
492 enzymes responsible for fatty acid turnover. These alterations might contribute  
493 to changes in energy metabolism that favor the accumulation of adipose tissue  
494 and increased inflammation at older age.

495  
496 From a mechanistic point of view, it is conceivable that adaptation to the  
497 particular ecosystem of NMRs has selected for characteristics of energy  
498 metabolism that in turn enabled extreme longevity via activation of stress  
499 pathways (Figure 6). Among these, the NFE2L2 pathway, which control the  
500 expression of many of the detoxifying enzymes that we found increased in NMR  
501 vs. GP, was shown to have enhanced activity in NMR [11]. The activity of the  
502 same pathways tend to decline during aging, as shown here by the decline of  
503 their target genes in both NMR and humans, and in different systems [51,52]. It  
504 is therefore tempting to speculate that their higher basal activity in the NMR  
505 might contribute to its enhanced stress resistance, and ultimately delay the aging  
506 process. In line with this hypothesis, genes encoding for both, respiratory  
507 electron transport chain and response to oxidative stress have been shown to be  
508 under positive selection in the NMR [6]. Additionally, similar molecular networks  
509 (lipid metabolism and oxidative stress pathways) are involved in the social  
510 status transition from worker to breeder in NMR [53], suggesting common  
511 evolutionary constrains and molecular mechanism underlying longevity and  
512 eusociality, i.e. reproductive animals' lifelong fecundity coupled with  
513 extraordinary life- and healthspan in the NMR [54] and even extended lifespan in  
514 other mole-rats [55,56] and longevity. Further work is required to elucidate in  
515 detail which aspects of liver metabolism are sufficient to promote lifespan, and  
516 what is the molecular basis mediating positive systemic effects that support  
517 organism health by delaying aging in NMR.

518

Heinze, Bens, Calzia, et al.

519

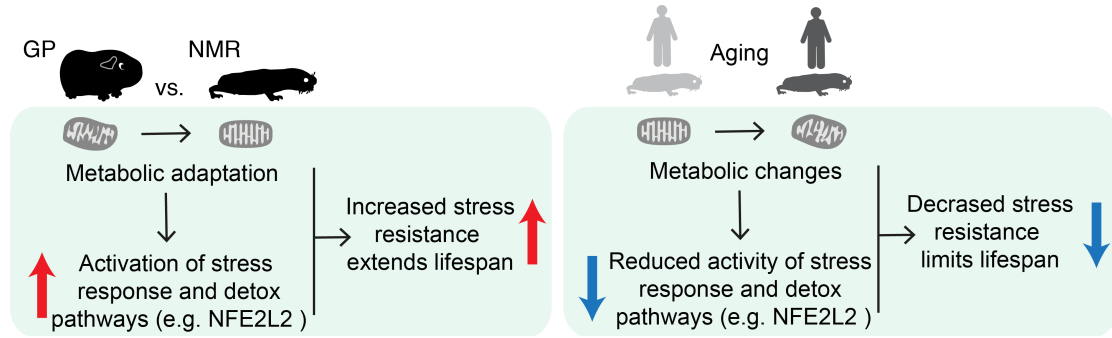

520

521

522

523

524

**Figure 6. Proposed model linking metabolic changes to stress response/detoxifying pathways in NMR and during aging.**

Heinze, Bens, Calzia, et al.

525 **Materials and methods:**

526

527 *Samples*

528

529 Young NMR and GP liver tissue samples were obtained at the Leibniz Institute  
530 for Zoo and Wildlife Research, IZW (Berlin, Germany). Old NMR liver tissue  
531 samples were obtained from the Stockholm Zoo. Sampling and animal  
532 procedures were approved by the local ethics committee of the “Landesamt für  
533 Gesundheit und Soziales”, Berlin, Germany (reference numbers: #ZH 156,  
534 G02217/12, and T 0073/15) and were compliant with the national and  
535 institutional animal care guidelines. NMRs were kept inside artificial burrow  
536 systems, consisting of acrylic glass containers interconnected with tubes. Except  
537 during cleaning and management procedures, animals were kept in complete  
538 darkness and supplied daily *ad libitum* with fresh vegetables. Temperature and  
539 humidity were kept stable at 27.0±2.0°C and 85.0±5.0%, respectively. GPs  
540 (breed: Dunkin Hartley HsdDhl:DH, Harlan Laboratories, AN Venray,  
541 Netherlands) were kept pairwise in standardized GP cages with a 12h light-dark  
542 cycle. They were fed commercial pellets and fresh vegetables daily; hay and  
543 vitamin C enriched water were provided *ad libitum*. Temperature and humidity  
544 ranged between 18.0±2.0°C and 45.0±5.0%, respectively. For tissue collection,  
545 animals were euthanized by surgical decapitation under general anaesthesia  
546 (Isofluran CP, CP-Pharma, Burgdorf, Germany). Tissue samples were fresh frozen  
547 and stored in liquid nitrogen before transcriptome or proteome analysis.

548

549 Human liver tissue samples were provided by the tissue bank of the National  
550 Center for Tumor Diseases (NCT, Heidelberg, Germany) in accordance with the  
551 regulations of the tissue bank and the approval of the ethics committee of  
552 Heidelberg University. These samples were obtained in a transplant setting to  
553 check the quality of the donor liver by histology before implantation. The age of  
554 the donors ranges from 31-88. The tissue samples were formalin fixed, paraffin-  
555 embedded (FFPE) and slides were stained with hematoxylin and eosin (H&E).  
556 These full-section H&E slides were re-evaluated by a trained pathologist (SS)  
557 confirming that each of the samples used for proteomic analyses did not show  
558 any overt pathomorphological changes (e.g. necrosis or significant inflammatory  
559 or fatty changes).

560

561 *RNA sequencing analysis.*

562

563 Reference transcripts

564 Reference transcripts for NMR are based on recently published de novo  
565 transcriptome assembly [57]. Reference transcripts for GP were obtained by *de*  
566 *novo* transcriptome assembly of ten different tissue samples as described in [53],  
567 using the human transcriptome as a reference for gene symbol assignment. Both  
568 transcript sets were mapped to the corresponding genomes (NMR UCSC hetgla2,  
569 GP UCSC cavpor3) in two steps: BLAT was used to identify the locus and then  
570 SPLIGN (v1.39.8) was applied to splice align the transcript sequence within BLAT  
571 locus.

572

573

Heinze, Bens, Calzia, et al.

574 Transcript quantification

575 For NMR age comparison RNA-seq data were aligned to the reference genome  
576 utilizing STAR (v2.4.1d) with a maximum mismatch of 6% and a minimum  
577 aligned length of 90%. Reads mapped to multiple loci were discarded. Gene  
578 expression was quantified using HTSEQ (v0.6.1p1) based on the aligned  
579 reference transcripts. For cross-species comparison (NMR vs. GP) orthologous  
580 transcribed regions were determined using PosiGene [58] with parameter  
581 'prank=0 max\_anchor\_gaps\_hard=100 rs=NMR'. RNA-seq data were aligned to  
582 corresponding orthologous transcribed regions in NMR and GP reference  
583 transcripts using bowtie2 (2.2.9) with the parameter '--very-sensitive-local'.  
584 DESeq2 (v1.6.3) was used to identify DEGs after correction of p-values using  
585 Benjamini Hochberg (FDR, denoted as 'q') for NMR aging and cross-species  
586 comparison.

587

588 Data availability

589 RNA-seq data of GP used in *de novo* assembly were deposited at Sequence Read  
590 Archive (SRP104222). RNA-seq data for NMR age and cross-species comparisons  
591 were deposited in Gene Expression Omnibus (GSE98744, GSE98744). The  
592 corresponding gene annotation for NMR and GP are available as a gff3-file  
593 (<ftp://genome.leibniz-fli.de/pub/nmr2017/>).

594

595 *Sample preparation for mass spectrometry*

596

597 NMR and GP fresh frozen liver samples for label free cross species comparison

598 Frozen tissue samples of NMR and GP livers (between 20 and 40 mg, Table S1)  
599 were collected into Precellys Lysing kit tubes (Keramik-kit 1.4/2.8 mm, 2 mL  
600 (CKM)) containing 200  $\mu$ L of protein solubilization buffer (80  $\mu$ M Tris pH 8.0, 80  
601  $\mu$ M DTT and 4% SDS) and processed directly. Samples were homogenized in the  
602 Precellys 24 homogenizer (Bertin Instruments, France) at 5000 rpm for 30  
603 seconds at 4 °C. Samples were then spun down and the supernatant transferred  
604 to a 1.5 mL Eppendorf tube. Samples were sonicated using a Bioruptor Plus  
605 (Diagenode) for 7.5 minutes (5 cycles: 1 min on, 30 sec off, 20 °C) using the high  
606 setting, and then boiled for 10 min at 95°C. A second round of sonication (as  
607 before) followed the boiling. Samples were spun down at 20800x *g* for 5 minutes  
608 and the lysate supernatant transferred to fresh tubes. Protein concentration was  
609 determined by BCA assay (Pierce) using standard protocol and adjusted to 10  
610  $\mu$ g/ $\mu$ L using solubilization buffer. 5  $\mu$ L of tissue lysate, corresponding to 50  $\mu$ g  
611 protein, was taken for preparation for MS. Cysteine residues were alkylated by  
612 adding 1  $\mu$ L of, 200 mM iodoacetamide to a final concentration of 15 mM  
613 (incubated for 30 min at room temperature in the dark). Reaction was quenched  
614 by addition of 1  $\mu$ L of 200 mM DTT. Sample clean-up proceeded following a  
615 modified SP3 protocol. Sera-Mag Speed Beads (#45152105050250 and  
616 #65152105050250, Thermo Scientific) were mixed 1:1, rinsed with water and  
617 stored as a 40  $\mu$ g/ $\mu$ L stock solution in 4°C, as described in [59]. 4  $\mu$ L of beads  
618 stock was added to the reaction tube and mixed by pipetting then 11  $\mu$ L  
619 acetonitrile containing 5% (v/v) formic acid was added. Samples were incubated  
620 for 8 minutes at room temperature to allow protein bindings to the beads. Next,  
621 tubes were placed on the magnetic rack. Supernatant was removed and  
622 discarded. Beads were washed twice with 180  $\mu$ L of 70% (v/v) ethanol and once

Heinze, Bens, Calzia, et al.

623 with 180  $\mu\text{L}$  of 100% acetonitrile. After removal of acetonitrile beads were air-  
624 dried for 60 sec and then resuspended in 7  $\mu\text{L}$  of digestion buffer (6  $\mu\text{L}$  4 M urea  
625 in 100 mM ammonium bicarbonate and 1  $\mu\text{L}$  of 1  $\mu\text{g}/\mu\text{L}$  of LysC (Wako)).  
626 Samples were sonicated for 5 min in water bath, incubated for 5 min at 37°C and  
627 then mixed by pipetting. Digestion was allowed to proceed for 4 h at 37°C. After  
628 the first step of digestion, beads were resuspended by pipetting, urea was diluted  
629 to the final concentration of 1.5 M and 1  $\mu\text{L}$  of 1  $\mu\text{g}/\mu\text{L}$  of sequencing grade  
630 trypsin (Promega) was added to samples. Digestion was performed overnight at  
631 37°C. After digestion, beads were resuspended by pipetting. 100% acetonitrile  
632 was added to the final concentration of 95% (v/v) and samples were incubated  
633 for 8 min at room temperature. Tubes were placed on the magnetic rack and  
634 washed twice with 100% acetonitrile. Supernatant was removed and beads air-  
635 dried and reconstituted in 20  $\mu\text{L}$  of 2% DMSO followed by 5 min of sonication in  
636 the water bath. Samples were resuspended by pipetting and placed on the  
637 magnetic rack. Supernatant containing peptides was transferred to a fresh tube  
638 and acidified with 2  $\mu\text{L}$  of 1% (v/v) formic acid prior to pre-fractionation by high  
639 pH reverse phase chromatography. Offline high pH reverse phase fractionation  
640 was performed using an Agilent 1260 Infinity HPLC System equipped with a  
641 binary pump, degasser, variable wavelength UV detector (set to 220 and 254  
642 nm), peltier-cooled autosampler (set at 10°C) and a fraction collector. The  
643 column was a Waters XBridge C18 column (3.5  $\mu\text{m}$ , 100 x 1.0 mm, Waters) with a  
644 Gemini C18, 4 x 2.0 mm SecurityGuard (Phenomenex) cartridge as a guard  
645 column. The solvent system consisted of 20 mM ammonium formate (pH 10.0) as  
646 mobile phase (A) and 100% acetonitrile as mobile phase (B). The separation was  
647 accomplished at a mobile phase flow rate of 0.1 mL/min using a linear gradient  
648 from 100% A to 35 % B in 61 min. Thirty-four fractions were collected along  
649 with the LC separation, which were subsequently pooled into 10 fractions.  
650 Pooled fractions were dried in a Speed-Vac and then stored at -80°C until LC-  
651 MS/MS analysis.

652

653 NMR frozen liver samples for TMT-based comparison of young and old samples

654 For each experimental animal (Table S1), 100  $\mu\text{g}$  protein lysate from the bead-  
655 beaten stock of tissue described above were taken up to a final volume of 50  $\mu\text{L}$   
656 with 100 mM HEPES buffer, pH 8.5. 5  $\mu\text{L}$  of 2% SDS was added, prior to  
657 biorupting (5 cycles: 1 min on, 30 sec off, 20 °C) at the highest settings. Samples  
658 were spun down at 20800x *g* for 1 minute and the lysate supernatant transferred  
659 to fresh tubes. Reduction was performed with 2.9  $\mu\text{L}$  DTT (200 mM) for 15  
660 minutes at 45 °C before alkylation with 200 mM IAA (5  $\mu\text{L}$ , 30 minutes, room  
661 temperature, in the dark). Proteins were then precipitated with 4 volumes ice  
662 cold acetone to 1 volume sample and left overnight at -20 °C. The samples were  
663 then centrifuged at 20800x *g* for 30 minutes, 4 °C. After removal of the  
664 supernatant, the precipitates were washed twice with 500  $\mu\text{L}$  80% (v/v) acetone  
665 (ice cold). After each wash step, the samples were vortexed, then centrifuged  
666 again for 2 minutes at 4°C. The pellets were then allowed to air-dry before being  
667 dissolved in digestion buffer (50  $\mu\text{L}$ , 3M urea in 0,1M HEPES, pH 8; 1  $\mu\text{g}$  LysC)  
668 and incubated for 4 h at 37 °C with shaking at 600 rpm. Then the samples were  
669 diluted 1:1 with milliQ water (to reach 1.5M urea) and were incubated with 1  $\mu\text{g}$   
670 trypsin for 16 h at 37 °C. The digests were then acidified with 10% trifluoroacetic  
671 acid and then desalted with Waters Oasis® HLB  $\mu\text{Elution Plate 30}\mu\text{m}$  in the



Heinze, Bens, Calzia, et al.

672 presence of a slow vacuum. In this process, the columns were conditioned with  
673 3x100  $\mu$ L solvent B (80% (v/v) acetonitrile; 0.05% (v/v) formic acid) and  
674 equilibrated with 3x 100  $\mu$ L solvent A (0.05% (v/v) formic acid in milliQ water).  
675 The samples were loaded, washed 3 times with 100  $\mu$ L solvent A, and then eluted  
676 into PCR tubes with 50  $\mu$ L solvent B. The eluates were dried down with the speed  
677 vacuum centrifuge and dissolved in 200 mM HEPES buffer, pH 8.5 for TMT  
678 labeling. 25  $\mu$ g peptides were taken for each labeling reaction at 1  $\mu$ g/ $\mu$ L  
679 concentration. TMT-6plex reagents (Thermo Scientific) were reconstituted in 41  
680  $\mu$ L 100% anhydrous DMSO. TMT labeling was performed by addition of 2.5  $\mu$ L of  
681 the TMT reagent. After 30 minutes of incubation at room temperature, with  
682 shaking at 600 rpm in a thermomixer (Eppendorf) a second portion of TMT  
683 reagent (2.5  $\mu$ L) was added and incubated for another 30 minutes. The reaction  
684 was quenched with 1  $\mu$ L of 20 mM lysine in 100 mM ammonium bicarbonate.  
685 After checking labeling efficiency, samples were pooled (48  $\mu$ g total), cleaned  
686 once again with Oasis and subjected to high pH fractionation prior to MS  
687 analysis. Offline high pH reverse phase fractionation was performed as described  
688 above with the following modifications for TMT labeled samples: (i) the  
689 separation was accomplished at a mobile phase flow rate of 0.1 mL/min using a  
690 non-linear gradient from 95% A to 40 % B in 91 min; (ii) 48 fractions were  
691 collected along with the LC separation that were subsequently pooled into 16  
692 fractions.

693

#### 694 Human FFPE liver samples

695 The specimens were cut on a microtome into 5  $\mu$ m thick sections and mounted  
696 on glass slides. Slides were deparaffinized in xylene for 2x 5 minutes, rehydrated  
697 in 100% ethanol for 2x 5 minutes, and then washed in 96% (v/v), 70% (v/v),  
698 50% (v/v) ethanol and milliQ water for 1x 5 minutes each. Region of interest  
699 were gently scraped using a scalpel and transferred to a PCR tube containing 100  
700  $\mu$ L of protein solubilization buffer (80  $\mu$ M Tris pH 8.0, 80  $\mu$ M DTT and 4% SDS)  
701 and processed directly. Samples were sonicated using a Bioruptor Plus  
702 (Diagenode) for 25.2 min (15 cycles: 1 min on, 30 sec off) at 20°C using the high  
703 setting, and then boiled for 1h at 99°C. Sonication followed by boiling was  
704 performed twice. Cysteine residues were alkylated by adding 200 mM  
705 iodoacetamide to a final concentration of 15 mM (incubated for 30 min at room  
706 temperature in the dark). Reaction was quenched by addition of 10  $\mu$ L of 200  
707 mM DTT. Protein were then acetone precipitated, digested and desalted as  
708 described above for NMR samples (aging comparison), with the exceptions that  
709 0.5  $\mu$ g of both LysC and trypsin were used instead of 1  $\mu$ g to accommodate for the  
710 lower amount of protein extract employed, and no TMT labeling was performed.

711

#### 712 *Mass spectrometry data acquisition*

713

#### 714 Label free analysis of NMR and GP liver samples

715 For label free experiments, each fraction from the 4 GP and 4 NMR samples,  
716 separated by high pH, were resuspended in 10  $\mu$ L reconstitution buffer (5%  
717 (v/v) acetonitrile, 0.1% (v/v) TFA in water) and 8  $\mu$ L were injected. Peptides  
718 were separated using the nanoAcquity UPLC system (Waters) fitted with a  
719 trapping (nanoAcquity Symmetry C18, 5  $\mu$ m, 180  $\mu$ m x 20 mm) and an analytical  
720 column (nanoAcquity BEH C18, 2.5  $\mu$ m, 75  $\mu$ m x 250 mm). The outlet of the

Heinze, Bens, Calzia, et al.

721 analytical column was coupled directly to an Orbitrap Fusion Lumos (Thermo  
722 Fisher Scientific) using the Proxeon nanospray source. Solvent A was water,  
723 0.1% (v/v) formic acid and solvent B was acetonitrile, 0.1% (v/v) formic acid.  
724 The samples were loaded with a constant flow of solvent A at 5  $\mu\text{L}/\text{min}$ , onto the  
725 trapping column. Trapping time was 6 min. Peptides were eluted via the  
726 analytical column at a constant flow of 0.3  $\mu\text{L}/\text{min}$ , at 40°C. During the elution  
727 step, the percentage of solvent B increased in a linear fashion from 5% to 7% in  
728 10 minutes, then from 7% B to 30% B in a further 105 min and to 45% B by 130  
729 min. The peptides were introduced into the mass spectrometer via a Pico-Tip  
730 Emitter 360  $\mu\text{m}$  OD x 20  $\mu\text{m}$  ID; 10  $\mu\text{m}$  tip (New Objective) and a spray voltage of  
731 2.2kV was applied. The capillary temperature was set at 300°C. Full scan MS  
732 spectra with mass range 375-1500  $m/z$  were acquired in profile mode in the  
733 Orbitrap with resolution of 120000 using the quad isolation. A first batch of  
734 samples (NMR: F1-6074, M1-1449; GP: #18, #19) was acquired with the  
735 following settings. The RF on the ion funnel was set to 60%. The filling time was  
736 set at maximum of 100 ms with an AGC target of  $4 \times 10^5$  ions and 1 microscan.  
737 The peptide monoisotopic precursor selection was enabled along with relaxed  
738 restrictions if too few precursors were found. The most intense ions (instrument  
739 operated for a 3 second cycle time) from the full scan MS were selected for MS2,  
740 using quadrupole isolation and a window of 1.6 Da. An intensity threshold of  $5 \times 10^3$   
741 ions was applied. HCD was performed with collision energy of 35%. A  
742 maximum fill time of 30 ms with an AGC target of  $1 \times 10^4$  for each precursor ion  
743 was set. MS2 data were acquired in centroid in the ion trap, in Rapid scan mode,  
744 with fixed first mass of 120  $m/z$ . The dynamic exclusion list was with a maximum  
745 retention period of 60 sec and relative mass window of 10 ppm. In order to  
746 improve the mass accuracy, internal lock mass correction using a background ion  
747 ( $m/z$  445.12003) was applied. For data acquisition and processing of the raw  
748 data Xcalibur 4.0 (Thermo Scientific) and Tune version 2.0 were employed. As a  
749 consequence of method optimization, the following parameters were changed  
750 for a second batch of samples (NMR: #0713, #4925; GP: #23, #28): RF on the ion  
751 funnel was set to 40%, AGC target to  $2 \times 10^5$ , quadrupole isolation window to 1.4  
752 Da, HCD collision energy to 30%, fill time to 300 ms, AGC target to  $2 \times 10^3$ , and  
753 the instrument was set to inject ions for all available parallelizable time. Since  
754 the two batches of samples were block randomized (i.e. both contained the same  
755 number of NMR and GP samples), the usage of two different methods did not  
756 influence the outcome of our comparison, as shown by the expected clustering of  
757 the samples according to the species of origin (Figure 1B).

758

#### 759 TMT analysis of NMR young and old samples

760 For TMT-6plex experiments, fractions were resuspended in 10  $\mu\text{L}$  reconstitution  
761 buffer (5% (v/v) acetonitrile, 0.1% (v/v) TFA in water) and 3.5  $\mu\text{L}$  were injected.  
762 Peptides were analyzed using the same LC-MS/MS setup described above with  
763 the following modifications. Peptides were eluted using a linear gradient from  
764 5% to 7% in 10 minutes, then from 7% B to 30% B in a further 105 min and to  
765 45% B by 130 min. Full scan MS spectra with mass range 375-1500  $m/z$  were  
766 acquired in profile mode in the Orbitrap with resolution of 60000 using the quad  
767 isolation. The RF on the ion funnel was set to 40%. The filling time was set at  
768 maximum of 100 ms with an AGC target of  $4 \times 10^5$  ions and 1 microscan. The  
769 peptide monoisotopic precursor selection was enabled along with relaxed

Heinze, Bens, Calzia, et al.

770 restrictions if too few precursors were found. The most intense ions (instrument  
771 operated for a 3 second cycle time) from the full scan MS were selected for MS2,  
772 using quadrupole isolation and a window of 1 Da. HCD was performed with  
773 collision energy of 35%. A maximum fill time of 50 ms for each precursor ion was  
774 set. MS2 data were acquired with fixed first mass of 120  $m/z$ . The dynamic  
775 exclusion list was with a maximum retention period of 60 sec and relative mass  
776 window of 10 ppm. For the MS3, the precursor selection window was set to the  
777 range 400-2000  $m/z$ , with an exclude width of 18  $m/z$  (high) and 5  $m/z$  (low).  
778 The most intense fragments from the MS2 experiment were co-isolated (using  
779 Synchronus Precursor Selection = 8) and fragmented using HCD (65%). MS3  
780 spectra were acquired in the Orbitrap over the mass range 100-1000  $m/z$  and  
781 resolution set to 30000. The maximum injection time was set to 105 ms and the  
782 instrument was set not to inject ions for all available parallelizable time.

783

#### 784 Data Independent Acquisition (DIA) for human FFPE samples

785 Peptides were spiked with retention time HRM kit (Biognosys AG), and analyzed  
786 using the same LC-MS/MS setup described above with the following  
787 modifications. Approx. 1  $\mu\text{g}$  for Data Dependent Acquisition (DDA) and 3  $\mu\text{g}$  for  
788 DIA analysis were loaded. Peptides were eluted via a non-linear gradient from 0  
789 % to 40 % in 120 minutes. Total runtime was 145 minutes, including clean-up  
790 and column re-equilibration. The RF lens was set to 30%. For spectral library  
791 generation, a pooled sample was generated by mixing equal portion of each  
792 sample, injected 12 times, and measured in DDA mode. The conditions for DDA  
793 data acquisition were as follows: Full scan MS spectra with mass range 350-  
794 1650  $m/z$  were acquired in profile mode in the Orbitrap with resolution of  
795 60000. The filling time was set at maximum of 50 ms with limitation of  $2 \times 10^5$   
796 ions. The "Top Speed" method was employed to take the maximum number of  
797 precursor ions (with an intensity threshold of  $5 \times 10^4$ ) from the full scan MS for  
798 fragmentation (using HCD collision energy, 30%) and quadrupole isolation (1.4  
799 Da window) and measurement in the Orbitrap (resolution 15000, fixed first  
800 mass 120  $m/z$ ), with a cycle time of 3 seconds. The MIPS (monoisotopic  
801 precursor selection) peptide algorithm was employed but with relaxed  
802 restrictions when too few precursors meeting the criteria were found. The  
803 fragmentation was performed after accumulation of  $2 \times 10^5$  ions or after filling  
804 time of 22 ms for each precursor ion (whichever occurred first). MS/MS data  
805 were acquired in centroid mode. Only multiply charged ( $2^+ - 7^+$ ) precursor ions  
806 were selected for MS/MS. Dynamic exclusion was employed with maximum  
807 retention period of 15s and relative mass window of 10 ppm. Isotopes were  
808 excluded. For data acquisition and processing Tune version 2.1 was employed.

809 For the DIA data acquisition the same gradient conditions were applied to the LC  
810 as for the DDA and the MS conditions were varied as follows: Full scan MS  
811 spectra with mass range 350-1650  $m/z$  were acquired in profile mode in the  
812 Orbitrap with resolution of 120000. The filling time was set at maximum of 20  
813 ms with limitation of  $5 \times 10^5$  ions. DIA scans were acquired with 34 mass  
814 window segments of differing widths across the MS1 mass range with a cycle  
815 time of 3 seconds. HCD fragmentation (30% collision energy) was applied and  
816 MS/MS spectra were acquired in the Orbitrap with a resolution of 30000 over  
817 the mass range 200-2000  $m/z$  after accumulation of  $2 \times 10^5$  ions or after filling

Heinze, Bens, Calzia, et al.

818 time of 70 ms (whichever occurred first). Ions were injected for all available  
819 parallelizable time. Data were acquired in profile mode.

820

821 *Mass spectrometry data analysis*

822

823 Label free cross-species comparison of NMR and GP liver samples

824 The Andromeda search engine [60], part of MaxQuant (version 1.5.3.28) [61] was  
825 used to search the data. The data for GP and NMR were searched separately  
826 against translated species-specific reference transcripts (see RNA sequencing  
827 analysis). Database with a list of common contaminants were appended in both  
828 cases. The data were searched with the following modifications:  
829 Carbamidomethyl (C) (Fixed), and Oxidation (M) and Acetyl (Protein N-term)  
830 (Variable). The mass error tolerance for the full scan MS spectra was set at 20  
831 ppm and for the MS/MS spectra at 0.5 Da. A maximum of 2 missed cleavages  
832 were allowed. Peptide and protein level 1% FDR were applied using a target-  
833 decoy strategy [62]. iBAQ (label free quantification) values from the MaxQuant  
834 output were used to perform cross-species differential protein expression  
835 analysis using scripts written in R (v3.4.1). After removal of reverse and  
836 contaminant hits, only protein groups quantified by at least two unique peptides  
837 were retained. Common human gene symbols were used to combine iBAQ values  
838 for NMR and GP samples. Only protein groups quantified in at least two animals  
839 per group were retained when comparing protein abundances between NMR  
840 and GP. To reduce technical variation, data were  $\log_2$  transformed and quantile-  
841 normalized using the preprocessCore library. Protein differential expression was  
842 evaluated using the limma package [63]. Differences in protein abundances were  
843 statistically determined using the Student's t test moderated by the empirical  
844 Bayes method. P values were adjusted for multiple testing using the Benjamini-  
845 Hochberg method [64] (Table S2).

846

847 TMT-based analysis of young and old NMR livers

848 TMT-6plex data were processed using Proteome Discoverer v2.0 (Thermo Fisher  
849 Scientific). Data were searched against the NMR fasta database using Mascot  
850 v2.5.1 (Matrix Science) with the following settings: Enzyme was set to trypsin,  
851 with up to 1 missed cleavage. MS1 mass tolerance was set to 10 ppm and MS2 to  
852 0.5 Da. Carbamidomethyl cysteine was set as a fixed modification and oxidation  
853 of Methionine as variable. Other modifications included the TMT-6plex  
854 modification from the quan method used. The quan method was set for reporter  
855 ions quantification with HCD and MS3 (mass tolerance, 20 ppm). The false  
856 discovery rate for peptide-spectrum matches (PSMs) was set to 0.01 using  
857 Percolator [65]. Reporter ion intensity values for the filtered PSMs were  
858 exported and processed using in-house written R scripts to remove common  
859 contaminants and decoy hits. Additionally only PSMs having reporter ion  
860 intensities above  $1 \times 10^3$  in all the relevant TMT channels were retained for  
861 quantitative analysis. Only protein groups quantified by at least two unique  
862 peptides were analyzed for differential expression between young and old NMR.  
863 Data were analysed using the MSnbase package [66]. Reporter ion intensities  
864 were  $\log_2$ -transformed and normalized using the vsn package [67]. Peptide-level  
865 data were summarized into their respective protein groups by taking the median

Heinze, Bens, Calzia, et al.

866 value. Differential protein expression was assessed using the limma package, as  
867 described above (Table S4).

868

#### 869 DIA analysis of FFPE human samples

870 For library creation, the DDA data was searched using the Andromeda search  
871 engine built in MaxQuant (version 1.5.3.28). The data were searched against a  
872 human database (Swiss-Prot entries of the Uniprot KB database release 2016\_01,  
873 20198 entries) with a list of common contaminants appended, as well as the  
874 HRM peptide sequences. The data were searched with the following  
875 modifications: Carbamidomethyl (C) (Fixed) and Oxidation (M)/ Acetyl (Protein  
876 N-term) (Variable). The mass error tolerance for the full scan MS and MS/MS  
877 spectra was set at 20 ppm. A maximum of 1 missed cleavage was allowed. The  
878 identifications were filtered to satisfy FDR of 1 % on peptide and protein level. A  
879 spectral library was created from the MaxQuant output of the DDA runs  
880 combined using Spectronaut (version 10, Biognosys AG). This library contained  
881 58296 precursors, corresponding to 4624 protein groups using Spectronaut  
882 protein inference. DIA data were then uploaded and searched against this  
883 spectral library. Precursor matching, protein inference and quantification was  
884 performed in Spectronaut using default settings [68]. Differential protein  
885 expression was evaluated using a pairwise t-test performed at the precursor  
886 level followed by multiple testing correction according to [69]. The data  
887 (candidate table, Table S7) was exported from Spectronaut and used for further  
888 data analyses (see below).

889

#### 890 *Data analysis*

891

892 For integrated analysis of RNA-seq and proteomic data, transcripts and protein  
893 groups were matched using the corresponding gene symbol, P values were  
894 combined using the Fisher method, followed by correction for multiple testing  
895 using the Benjamini-Hochberg method [64]. Gene set enrichments (Figures 2A  
896 and 3B) were performed with the R package *gage* [70] using gene set definitions  
897 from the Molecular Signatures Database (MSigDB, C2 v5.1) [71]. Gene Ontology  
898 enrichment analysis (Figure 4B) was performed the list of quantified proteins  
899 that were ranked according to the level of differential expression (fold change)  
900 using GOrilla (Eden et al., 2009) followed by GO term redundancy reduction  
901 performed by REViGO [72] using default settings.

902

#### 903 *Measurements of mitochondrial activity*

904

905 Mitochondrial respiration was measured in homogenized liver tissue samples of  
906 NMRs and mice by means of high-resolution respirometry using the Oroboros®  
907 Oxygraph-2K (Oroboros Instruments, Innsbruck, Austria). This device allows for  
908 simultaneous recording the O<sub>2</sub> concentration in two parallel chambers calibrated  
909 for 2 ml of respiration medium containing 110 mM D-Sucrose (Sigma 84097), 60  
910 mM K-lactobionate (Aldrich 153516), 0.5 mM ethylene glycol tetra acetic acid  
911 (Sigma E4378), 1 g/L bovine serum albumin free from essentially fatty acids  
912 (Sigma A 6003), 3 mM MgCl<sub>2</sub> (Scharlau MA0036), 20 mM taurine (Sigma T0625),  
913 10 mM KH<sub>2</sub>PO<sub>4</sub> (Merck 104873), 20mM HEPES (Sigma H7523), adjusted to pH  
914 7.1 with KOH and equilibrated with 21% O<sub>2</sub> at 37°C. Mitochondrial respiration

Heinze, Bens, Calzia, et al.

915 was quantified in terms of oxygen flux ( $JO_2$ ) calculated as the rate of change of  
916 the  $O_2$  concentration in the chambers normalized for wet tissue volume.

917 The liver tissue homogenates were generated from 40-50 mg of wet tissue  
918 samples suspended in 2 ml of ice-cold respiration medium. Aliquots of the  
919 homogenates were added to each oxygraph chamber in order to obtain a final  
920 amount of 4 mg of NMR liver tissue or 2 mg of mouse liver tissue per chamber.  
921 The different amount of tissue was chosen in order to obtain similar absolute  
922  $JO_2$ -values, i.e.  $JO_2$ -values not normalized per wet weight, in both species. Every  
923 sample was measured in duplicates; the mean values from both chambers were  
924 used for statistical analysis.

925 The titration sequence used for the experiments was as follows: 2 mM malate + 1  
926 mM octanoylcarnitine, 5 mM ADP, 10  $\mu$ M cytochrome c, 10 mM glutamate, 10  
927 mM succinate, 2.5  $\mu$ M oligomycin, 1  $\mu$ M carbonyl cyanide p-(trifluoromethoxy)-  
928 phenylhydrazine (FCCP), 0.5  $\mu$ M rotenone, and 5  $\mu$ M antimycin A. The  $JO_2$ -values  
929 after addition of octanoyl carnitine, malate, ADP, and cytochrome c allow  
930 quantifying fatty acid oxidation. The addition of cytochrome c after ADP is  
931 required to test the integrity of the outer mitochondrial membrane. If  
932 homogenization steps damaged the mitochondrial membrane, addition of  
933 cytochrome c induces an increase of the respiratory values. The maximum  
934 oxidative capacity of the mitochondrial respiratory chain in the coupled state  
935 (maximum OxPhos) was then determined after the subsequent addition of  
936 glutamate and succinate. Further injections of the ATP synthase inhibitor  
937 oligomycin and of the uncoupler FCCP allowed obtaining the maximum  
938 respiratory activity in the uncoupled state. In the next two steps, complex I and  
939 complex III were sequentially inhibited by administration of rotenone and  
940 antimycin A respectively. Finally sequentially injecting 2 mM ascorbate and 0.5  
941 mM of the complex IV substrate tetramethyl phenylene diamine (TMPD) in the  
942 parallel chambers allowed for selectively quantifying the activity of the  
943 cytochrome-c-oxidase (COX). Part of the  $JO_2$  induced by the injection of TMPD is  
944 caused by auto-oxidation of this compound. Therefore, inhibiting the COX by 40  
945  $\mu$ M sodium sulfide allowed to quantify and thus to subtract this auto-oxidation  
946 related part from the total  $JO_2$  value under TMPD.

947

948 *C.elegans lifespan measurements*

949

950 HT115 bacteria containing specific RNAi constructs were grown on lysogeny  
951 broth agar plates supplemented with ampicillin and tetracycline. Plates were  
952 kept at 4°C. Overnight cultures were grown in lysogeny broth media containing  
953 ampicillin. RNAi expression was induced by adding 1 mM  
954 isopropylthiogalactoside (IPTG) and incubating the cultures at 37°C for  
955 20 minutes before seeding bacteria on NGM agar supplemented with ampicillin  
956 and 3 mM IPTG. Synchronized L4 larvae were placed on 60 mm dishes containing  
957 RNAi expressing bacteria at a density of 70 worms per plate. Worms were  
958 transferred to new plates on a daily basis until adulthood day 6 (AD6) and later  
959 transferred to new plates every 3-4 days. The number of dead animals was  
960 scored daily. The analysis of the lifespan data including statistics was performed  
961 using GraphPad Prism software.

962

Heinze, Bens, Calzia, et al.

963 **Acknowledgements:**

964

965 We thank Stefan Pietsch for support with bioinformatics analysis. We gratefully  
966 acknowledge support from the FLI proteomics, sequencing, and bioinformatics  
967 core facilities. The FLI is a member of the Leibniz Association and is financially  
968 supported by the Federal Government of Germany and the State of Thuringia. We  
969 thank Veronika Geißler and other members of NCT tissue bank for their support.

970

971 **Author contributions:**

972

973 IH, EC, SH, MV performed experiments and analysed data; MB, AS, KS, NR  
974 analysed data; MP, TH, AO, SS, JMK, KS, EC, ME designed experiments; MP, TH  
975 and AO oversaw the project and wrote the manuscript.

976

Heinze, Bens, Calzia, et al.

977 **References:**

- 978
- 979 1. Fushan AA, Turanov AA, Lee S-G, Kim EB, Lobanov A V, Yim SH, et al. Gene  
980 expression defines natural changes in mammalian lifespan. *Aging Cell*. 2015;14:  
981 352–65. doi:10.1111/accel.12283
- 982 2. Sahm A, Bens M, Szafranski K, Holtze S, Groth M, Goerlach M, et al. Long-lived  
983 rodents reveal signatures of positive selection in genes associated with lifespan  
984 and eusociality. doi.org. Cold Spring Harbor Laboratory; 2017; 191999.  
985 doi:10.1101/191999
- 986 3. Lewis KN, Mele J, Hornsby PJ, Buffenstein R. Stress resistance in the naked mole-  
987 rat: the bare essentials - a mini-review. *Gerontology*. Karger Publishers; 2012;58:  
988 453–62. doi:10.1159/000335966
- 989 4. Skulachev VP, Holtze S, Vyssokikh MY, Bakeeva LE, Skulachev M V., Markov A V.,  
990 et al. Neoteny, Prolongation of Youth: From Naked Mole Rats to “Naked Apes”  
991 (Humans). *Physiol Rev*. 2017;97: 699–720. doi:10.1152/physrev.00040.2015
- 992 5. Kim EB, Fang X, Fushan AA, Huang Z, Lobanov A V., Han L, et al. Genome  
993 sequencing reveals insights into physiology and longevity of the naked mole rat.  
994 *Nature*. 2011;479: 223–227. doi:10.1038/nature10533
- 995 6. Fang X, Seim I, Huang Z, Gerashchenko M V., Xiong Z, Turanov AA, et al.  
996 Adaptations to a Subterranean Environment and Longevity Revealed by the  
997 Analysis of Mole Rat Genomes. *Cell Rep*. 2014;8: 1354–1364.  
998 doi:10.1016/j.celrep.2014.07.030
- 999 7. Yu C, Li Y, Holmes A, Szafranski K, Faulkes CG, Coen CW, et al. RNA sequencing  
1000 reveals differential expression of mitochondrial and oxidation reduction genes in  
1001 the long-lived naked mole-rat when compared to mice. *PLoS One*. Public Library  
1002 of Science; 2011;6: e26729. doi:10.1371/journal.pone.0026729
- 1003 8. Pérez VI, Buffenstein R, Masamsetti V, Leonard S, Salmon AB, Mele J, et al. Protein  
1004 stability and resistance to oxidative stress are determinants of longevity in the  
1005 longest-living rodent, the naked mole-rat. *Proc Natl Acad Sci U S A*. 2009;106:  
1006 3059–64. doi:10.1073/pnas.0809620106
- 1007 9. Rodriguez KA, Edrey YH, Osmulski P, Gaczynska M, Buffenstein R. Altered  
1008 composition of liver proteasome assemblies contributes to enhanced proteasome  
1009 activity in the exceptionally long-lived naked mole-rat. *PLoS One*. Public Library  
1010 of Science; 2012;7: e35890. doi:10.1371/journal.pone.0035890
- 1011 10. Buffenstein R. Negligible senescence in the longest living rodent, the naked mole-  
1012 rat: Insights from a successfully aging species [Internet]. *Journal of Comparative*  
1013 *Physiology B: Biochemical, Systemic, and Environmental Physiology*. 2008. pp.  
1014 439–445. doi:10.1007/s00360-007-0237-5
- 1015 11. Lewis KN, Wason E, Edrey YH, Kristan DM, Nevo E, Buffenstein R. Regulation of  
1016 Nrf2 signaling and longevity in naturally long-lived rodents. *Proc Natl Acad Sci U*  
1017 *S A*. National Academy of Sciences; 2015;112: 3722–7.  
1018 doi:10.1073/pnas.1417566112
- 1019 12. Tian X, Azpurua J, Hine C, Vaidya A, Myakishev-Rempel M, Ablaeva J, et al. High-  
1020 molecular-mass hyaluronan mediates the cancer resistance of the naked mole rat.  
1021 *Nature*. 2013;499: 346–349. doi:10.1038/nature12234
- 1022 13. Andziak B, O’Connor TP, Qi W, DeWaal EM, Pierce A, Chaudhuri AR, et al. High  
1023 oxidative damage levels in the longest-living rodent, the naked mole-rat. *Aging*  
1024 *Cell*. 2006;5: 463–471. doi:10.1111/j.1474-9726.2006.00237.x
- 1025 14. Holtze S, Eldarov CM, Vays VB, Vangeli IM, Vyssokikh MY, Bakeeva LE, et al. Study  
1026 of age-dependent structural and functional changes of mitochondria in skeletal  
1027 muscles and heart of naked mole rats (*Heterocephalus glaber*). *Biochem*.



Heinze, Bens, Calzia, et al.

- 1028 2016;81: 1429–1437. doi:10.1134/S000629791612004X
- 1029 15. Lewis KN, Andziak B, Yang T, Buffenstein R. The naked mole-rat response to  
1030 oxidative stress: just deal with it. *Antioxid Redox Signal*. Mary Ann Liebert, Inc.;  
1031 2013;19: 1388–99. doi:10.1089/ars.2012.4911
- 1032 16. Finkel T. The metabolic regulation of aging. *Nat Med*. 2015;21: 1416–1423.  
1033 doi:10.1038/nm.3998
- 1034 17. Fontana L, Partridge L. Promoting Health and Longevity through Diet: From  
1035 Model Organisms to Humans. *Cell*. 2015;161: 106–118.  
1036 doi:10.1016/j.cell.2015.02.020
- 1037 18. Davinelli S, Willcox DC, Scapagnini G. Extending healthy ageing: nutrient sensitive  
1038 pathway and centenarian population. *Immun Ageing*. 2012;9: 9.  
1039 doi:10.1186/1742-4933-9-9
- 1040 19. Sahm A, Bens M, Platzer M, Cellerino A. Parallel evolution of genes controlling  
1041 mitonuclear balance in short-lived annual fishes. *Aging Cell*. 11 Feb 2017.  
1042 doi:10.1111/ace1.12577
- 1043 20. Houtkooper RH, Mouchiroud L, Ryu D, Moullan N, Katsyuba E, Knott G, et al.  
1044 Mitonuclear protein imbalance as a conserved longevity mechanism. *Nature*.  
1045 Nature Publishing Group, a division of Macmillan Publishers Limited. All Rights  
1046 Reserved.; 2013;497: 451–7. doi:10.1038/nature12188
- 1047 21. Brandt T, Mourier A, Tain LS, Partridge L, Larsson N-G, Kühlbrandt W. Changes of  
1048 mitochondrial ultrastructure and function during ageing in mice and *Drosophila*.  
1049 *Elife*. 2017;6. doi:10.7554/eLife.24662
- 1050 22. Park TJ, Reznick J, Peterson BL, Blass G, Omerbašić D, Bennett NC, et al. Fructose-  
1051 driven glycolysis supports anoxia resistance in the naked mole-rat. *Science (80- )*.  
1052 2017;356: 307–311. doi:10.1126/science.aab3896
- 1053 23. Ori A, Toyama BH, Harris MS, Bock T, Iskar M, Bork P, et al. Integrated  
1054 Transcriptome and Proteome Analyses Reveal Organ-Specific Proteome  
1055 Deterioration in Old Rats. *Cell Syst*. Elsevier; 2015;1: 224–237.  
1056 doi:10.1016/j.cels.2015.08.012
- 1057 24. Schwanhäusser B, Busse D, Li N, Dittmar G, Schuchhardt J, Wolf J, et al. Global  
1058 quantification of mammalian gene expression control. *Nature*. Nature Publishing  
1059 Group, a division of Macmillan Publishers Limited. All Rights Reserved.;  
1060 2011;473: 337–42. doi:10.1038/nature10098
- 1061 25. Vogel C, Marcotte EM. Insights into the regulation of protein abundance from  
1062 proteomic and transcriptomic analyses. *Nat Rev Genet*. 2012;13: 227–32.  
1063 doi:10.1038/nrg3185
- 1064 26. Nyström T, Yang J, Molin M. Peroxiredoxins, gerontogenes linking aging to  
1065 genome instability and cancer. *Genes Dev*. 2012;26: 2001–8.  
1066 doi:10.1101/gad.200006.112
- 1067 27. Hanzén S, Vielfort K, Yang J, Roger F, Andersson V, Zamarbide-Forés S, et al.  
1068 Lifespan Control by Redox-Dependent Recruitment of Chaperones to Misfolded  
1069 Proteins. *Cell*. Elsevier; 2016;166: 140–151. doi:10.1016/j.cell.2016.05.006
- 1070 28. Biteau B, Karpac J, Supoyo S, DeGennaro M, Lehmann R, Jasper H. Lifespan  
1071 extension by preserving proliferative homeostasis in *Drosophila*. Kim SK, editor.  
1072 *PLoS Genet*. Public Library of Science; 2010;6: 1–15.  
1073 doi:10.1371/journal.pgen.1001159
- 1074 29. Erol A. The Functions of PPARs in Aging and Longevity. *PPAR Res*. Hindawi;  
1075 2007;2007: 39654. doi:10.1155/2007/39654
- 1076 30. Bustos V, Partridge L. Good Ol' Fat: Links between Lipid Signaling and Longevity.  
1077 *Trends Biochem Sci*. 2017; doi:10.1016/j.tibs.2017.07.001

Heinze, Bens, Calzia, et al.

- 1078 31. Cellerino A, Ori A. What have we learned on aging from omics studies? *Semin Cell*  
1079 *Dev Biol.* 2017; doi:10.1016/j.semcdb.2017.06.012
- 1080 32. Delire B, Lebrun V, Selvais C, Henriët P, Bertrand A, Horsmans Y, et al. Aging  
1081 enhances liver fibrotic response in mice through hampering extracellular matrix  
1082 remodeling. *Aging (Albany NY). Impact Journals, LLC;* 2016;9: 98–113.  
1083 doi:10.18632/aging.101124
- 1084 33. Hattori K, Inoue M, Inoue T, Arai H, Tamura H. A novel sulfotransferase  
1085 abundantly expressed in the dauer larvae of *Caenorhabditis elegans*. *J Biochem.*  
1086 2006;139: 355–62. doi:10.1093/jb/mvj041
- 1087 34. Fielenbach N, Antebi A. *C. elegans* dauer formation and the molecular basis of  
1088 plasticity. *Genes Dev.* 2008;22: 2149–65. doi:10.1101/gad.1701508
- 1089 35. Murphy CT, McCarroll SA, Bargmann CI, Fraser A, Kamath RS, Ahringer J, et al.  
1090 Genes that act downstream of DAF-16 to influence the lifespan of *Caenorhabditis*  
1091 *elegans*. *Nature.* 2003;424: 277–83. doi:10.1038/nature01789
- 1092 36. White RR, Milholland B, MacRae SL, Lin M, Zheng D, Vijg J. Comprehensive  
1093 transcriptional landscape of aging mouse liver. *BMC Genomics. BioMed Central;*  
1094 2015;16: 899. doi:10.1186/s12864-015-2061-8
- 1095 37. Durieux J, Wolff S, Dillin A. The cell-non-autonomous nature of electron transport  
1096 chain-mediated longevity. *Cell.* 2011;144: 79–91. doi:10.1016/j.cell.2010.12.016
- 1097 38. Baumgart M, Priebe S, Groth M, Hartmann N, Menzel U, Pandolfini L, et al.  
1098 Longitudinal RNA-seq analysis of vertebrate aging identifies mitochondrial  
1099 complex I as a small-molecule-sensitive modifier of lifespan. *Cell Syst.* 2016;2:  
1100 122–132. doi:10.1016/j.cels.2016.01.014
- 1101 39. Miwa S, Jow H, Baty K, Johnson A, Czapiewski R, Saretzki G, et al. Low abundance  
1102 of the matrix arm of complex I in mitochondria predicts longevity in mice. *Nat*  
1103 *Commun. Nature Publishing Group;* 2014;5: 3837. doi:10.1038/ncomms4837
- 1104 40. Sgarbi G, Matarrese P, Pinti M, Lanzarini C, Ascione B, Gibellini L, et al.  
1105 Mitochondria hyperfusion and elevated autophagic activity are key mechanisms  
1106 for cellular bioenergetic preservation in centenarians. *Aging (Albany NY). Impact*  
1107 *Journals, LLC;* 2014;6: 296–310. doi:10.18632/aging.100654
- 1108 41. Sengupta S, Peterson TR, Laplante M, Oh S, Sabatini DM. mTORC1 controls  
1109 fasting-induced ketogenesis and its modulation by ageing. *Nature. Nature*  
1110 *Research;* 2010;468: 1100–1104. doi:10.1038/nature09584
- 1111 42. Luis NM, Wang L, Ortega M, Deng H, Katewa SD, Li PW-L, et al. Intestinal IRE1 Is  
1112 Required for Increased Triglyceride Metabolism and Longer Lifespan under  
1113 Dietary Restriction. *Cell Rep. Elsevier;* 2016;17: 1207–1216.  
1114 doi:10.1016/j.celrep.2016.10.003
- 1115 43. Mitchell SJ, Madrigal-Matute J, Scheibye-Knudsen M, Fang E, Aon M, González-  
1116 Reyes JA, et al. Effects of Sex, Strain, and Energy Intake on Hallmarks of Aging in  
1117 Mice. *Cell Metab. Elsevier;* 2016;23: 1093–1112. doi:10.1016/j.cmet.2016.05.027
- 1118 44. Hahn O, Grönke S, Stubbs TM, Ficzk G, Hendrich O, Krueger F, et al. Dietary  
1119 restriction protects from age-associated DNA methylation and induces epigenetic  
1120 reprogramming of lipid metabolism. *Genome Biol.* 2017;18: 1194.  
1121 doi:10.1186/s13059-017-1187-1
- 1122 45. Kim HE, Grant AR, Simic MS, Kohnz RA, Nomura DK, Durieux J, et al. Lipid  
1123 Biosynthesis Coordinates a Mitochondrial-to-Cytosolic Stress Response. *Cell.*  
1124 2016;166: 1539–1552.e16. doi:10.1016/j.cell.2016.08.027
- 1125 46. Weir HJ, Yao P, Huynh FK, Escoubas CC, Goncalves RL, Burkewitz K, et al. Dietary  
1126 Restriction and AMPK Increase Lifespan via Mitochondrial Network and  
1127 Peroxisome Remodeling. *Cell Metab.* 2017; doi:10.1016/j.cmet.2017.09.024

Heinze, Bens, Calzia, et al.

- 1128 47. Toth M, Tchernof A. Lipid metabolism in the elderly. *Eur J Clin Nutr.* Nature  
1129 Publishing Group; 2000;54: S121–S125. doi:10.1038/sj.ejcn.1601033
- 1130 48. Solomon TPJ, Marchetti CM, Krishnan RK, Gonzalez F, Kirwan JP. Effects of aging  
1131 on basal fat oxidation in obese humans. *Metabolism.* 2008;57: 1141–1147.  
1132 doi:10.1016/j.metabol.2008.03.021
- 1133 49. St-Onge M-P, Gallagher D. Body composition changes with aging: the cause or the  
1134 result of alterations in metabolic rate and macronutrient oxidation? *Nutrition.*  
1135 NIH Public Access; 2010;26: 152–5. doi:10.1016/j.nut.2009.07.004
- 1136 50. Franceschi C, Campisi J, LR M, J C, JL K, HY C. Chronic Inflammation  
1137 (Inflammaging) and Its Potential Contribution to Age-Associated Diseases.  
1138 *Journals Gerontol Ser A Biol Sci Med Sci.* Oxford University Press; 2014;69: S4–S9.  
1139 doi:10.1093/gerona/glu057
- 1140 51. Done AJ, Gage MJ, Nieto NC, Traustadóttir T. Exercise-induced Nrf2-signaling is  
1141 impaired in aging. *Free Radic Biol Med.* 2016;96: 130–138.  
1142 doi:10.1016/j.freeradbiomed.2016.04.024
- 1143 52. Safdar A, deBeer J, Tarnopolsky MA. Dysfunctional Nrf2–Keap1 redox signaling in  
1144 skeletal muscle of the sedentary old. *Free Radic Biol Med.* 2010;49: 1487–1493.  
1145 doi:10.1016/j.freeradbiomed.2010.08.010
- 1146 53. Bens M, Szafranski K, Holtze S, Sahm A, Groth M, Kestler HA, et al. Naked mole-rat  
1147 transcriptome signatures of socially-suppressed sexual maturation and links of  
1148 reproduction to aging. *bioRxiv.* Cold Spring Harbor Laboratory; 2017; 221333.  
1149 doi:10.1101/221333
- 1150 54. Buffenstein R, Jarvis JUM. The Naked Mole Rat--A New Record for the Oldest  
1151 Living Rodent. *Sci Aging Knowl Environ.* 2002;2002: 7pe–7.  
1152 doi:10.1126/sageke.2002.21.pe7
- 1153 55. Dammann P, Šumbera R, Maßmann C, Scherag A, Burda H. Extended Longevity of  
1154 Reproductives Appears to be Common in *Fukomys* Mole-Rats (Rodentia,  
1155 Bathyergidae). de Polavieja GG, editor. *PLoS One.* 2011;6: e18757.  
1156 doi:10.1371/journal.pone.0018757
- 1157 56. Dammann P, Burda H. Sexual activity and reproduction delay ageing in a  
1158 mammal. *Curr Biol.* 2006;16: R117–R118. doi:10.1016/j.cub.2006.02.012
- 1159 57. Bens M, Sahm A, Groth M, Jahn N, Morhart M, Holtze S, et al. FRAMA: from RNA-  
1160 seq data to annotated mRNA assemblies. *BMC Genomics.* 2016;17: 54.  
1161 doi:10.1186/s12864-015-2349-8
- 1162 58. Sahm A, Bens M, Platzer M, Szafranski K. PosiGene: automated and easy-to-use  
1163 pipeline for genome-wide detection of positively selected genes. *Nucleic Acids*  
1164 *Res.* 2017;45: e100–e100. doi:10.1093/nar/gkx179
- 1165 59. Hughes CS, Foehr S, Garfield DA, Furlong EE, Steinmetz LM, Krijgsveld J.  
1166 Ultrasensitive proteome analysis using paramagnetic bead technology. *Mol Syst*  
1167 *Biol.* 2014;10: 757. Available:  
1168 [http://www.pubmedcentral.nih.gov/articlerender.fcgi?artid=4299378&tool=pm](http://www.pubmedcentral.nih.gov/articlerender.fcgi?artid=4299378&tool=pmcentrez&rendertype=abstract)  
1169 [centrez&rendertype=abstract](http://www.pubmedcentral.nih.gov/articlerender.fcgi?artid=4299378&tool=pmcentrez&rendertype=abstract)
- 1170 60. Cox J, Neuhauser N, Michalski A, Scheltema RA, Olsen J V., Mann M. Andromeda: A  
1171 Peptide Search Engine Integrated into the MaxQuant Environment. *J Proteome*  
1172 *Res.* 2011;10: 1794–1805. doi:10.1021/pr101065j
- 1173 61. Cox J, Mann M. MaxQuant enables high peptide identification rates, individualized  
1174 p.p.b.-range mass accuracies and proteome-wide protein quantification. *Nat*  
1175 *Biotechnol.* 2008;26: 1367–72. doi:10.1038/nbt.1511
- 1176 62. Elias JE, Gygi SP. Target-decoy search strategy for increased confidence in large-  
1177 scale protein identifications by mass spectrometry. *Nat Methods.* 2007;4: 207–

Heinze, Bens, Calzia, et al.

- 1178 214. doi:10.1038/nmeth1019
- 1179 63. Ritchie ME, Phipson B, Wu D, Hu Y, Law CW, Shi W, et al. limma powers  
1180 differential expression analyses for RNA-sequencing and microarray studies.  
1181 Nucleic Acids Res. 2015;43: e47–e47. doi:10.1093/nar/gkv007
- 1182 64. Benjamini Y, Hochberg Y. Controlling the False Discovery Rate: A Practical and  
1183 Powerful Approach to Multiple Testing [Internet]. Journal of the Royal Statistical  
1184 Society. Series B (Methodological). WileyRoyal Statistical Society; 1995. pp. 289–  
1185 300. doi:10.2307/2346101
- 1186 65. Brosch M, Yu L, Hubbard T, Choudhary J. Accurate and sensitive peptide  
1187 identification with Mascot Percolator. J Proteome Res. 2009;8: 3176–81.  
1188 doi:10.1021/pr800982s
- 1189 66. Gatto L, Lilley KS. MSnbase-an R/Bioconductor package for isobaric tagged mass  
1190 spectrometry data visualization, processing and quantitation. Bioinformatics.  
1191 2012;28: 288–289. doi:10.1093/bioinformatics/btr645
- 1192 67. Huber W, von Heydebreck A, Sültmann H, Poustka A, Vingron M. Variance  
1193 stabilization applied to microarray data calibration and to the quantification of  
1194 differential expression. Bioinformatics. 2002;18 Suppl 1: S96-104.
- 1195 68. Bruderer R, Bernhardt OM, Gandhi T, Miladinović SM, Cheng L-Y, Messner S, et al.  
1196 Extending the limits of quantitative proteome profiling with data-independent  
1197 acquisition and application to acetaminophen-treated three-dimensional liver  
1198 microtissues. Mol Cell Proteomics. 2015;14: 1400–10.  
1199 doi:10.1074/mcp.M114.044305
- 1200 69. Storey JD. A direct approach to false discovery rates. J R Stat Soc Ser B (Statistical  
1201 Methodol. Blackwell Publishers; 2002;64: 479–498. doi:10.1111/1467-  
1202 9868.00346
- 1203 70. Luo W, Friedman MS, Shedden K, Hankenson KD, Woolf PJ. GAGE: generally  
1204 applicable gene set enrichment for pathway analysis. BMC Bioinformatics.  
1205 2009;10: 161. doi:10.1186/1471-2105-10-161
- 1206 71. Subramanian A, Tamayo P, Mootha VK, Mukherjee S, Ebert BL, Gillette MA, et al.  
1207 Gene set enrichment analysis: a knowledge-based approach for interpreting  
1208 genome-wide expression profiles. Proc Natl Acad Sci U S A. National Academy of  
1209 Sciences; 2005;102: 15545–50. doi:10.1073/pnas.0506580102
- 1210 72. Supek F, Bošnjak M, Škunca N, Šmuc T. REVIGO summarizes and visualizes long  
1211 lists of gene ontology terms. PLoS One. Public Library of Science; 2011;6: e21800.  
1212 doi:10.1371/journal.pone.0021800
- 1213
